# Supplementary material for: Acquired miR-142 deficit in leukemic stem cells suffices to drive chronic myeloid leukemia into blast crisis
Source: PubMed Central journal article supplement (PMC10474062; doi:10.1038/s41467-023-41167-z), 2023-09-01
Supplement: 41467_2023_41167_MOESM1_ESM.pdf [file 41467_2023_41167_MOESM1_ESM.pdf]

**Acquired miR-142 Deficit in Leukemic Stem Cells Suffices to Drive Chronic Myeloid  
Leukemia into Blast Crisis**

**Inventory of Supplementary Information**

Supplementary figure 1

Supplementary figure 2

Supplementary figure 3

Supplementary figure 4

Supplementary figure 5

Supplementary figure 6

Supplementary figure 7

Supplementary figure 8

Supplementary figure 9

Supplementary figure 10

Supplementary Table 1

Supplementary Table 2

Supplementary Table 3

Supplementary Table 4

a

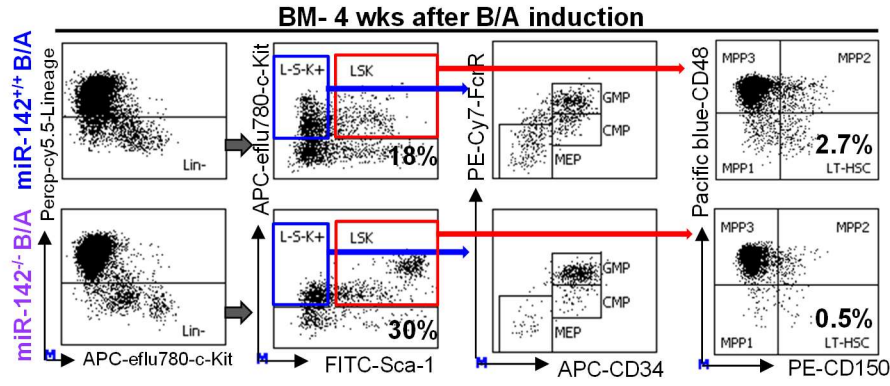

b

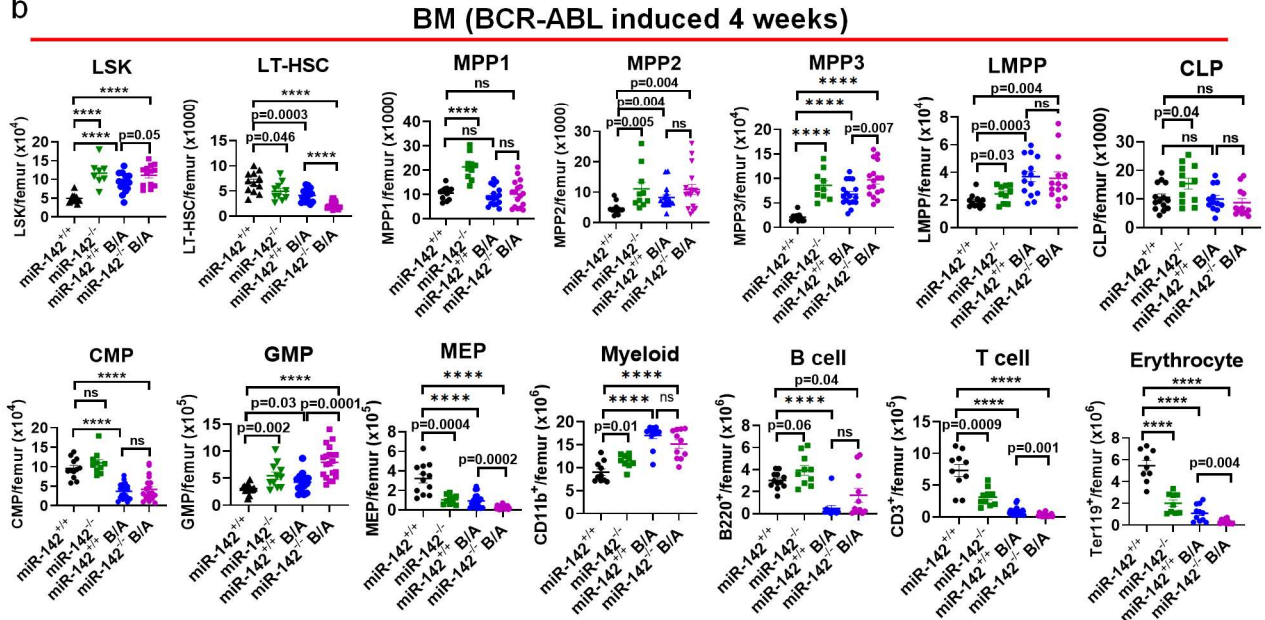

c

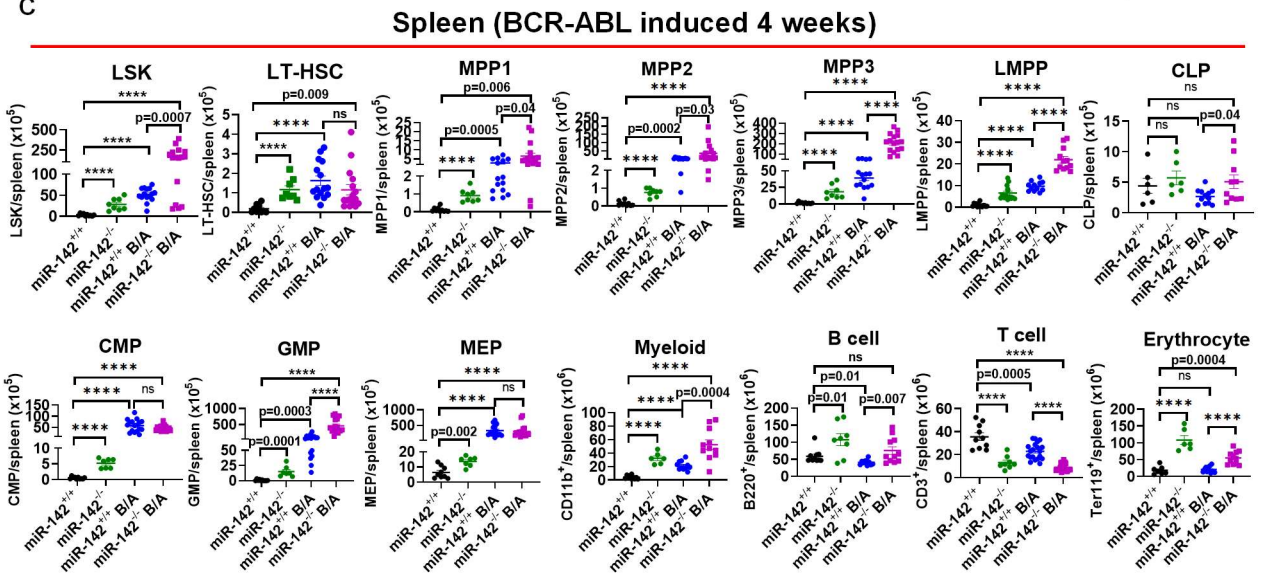

**Supplementary Fig. 1: BM and spleen hematopoietic cell subpopulations in *miR-142*<sup>-/-</sup>, *miR-142*<sup>+/+</sup>, *miR-142*<sup>-/-</sup>*BCR-ABL*, and *miR-142*<sup>+/+</sup>*BCR-ABL* mice.** **a** Representative plots of BM subpopulations, i.e., LSK (Lin<sup>-</sup>Sca-1<sup>+</sup>c-Kit<sup>+</sup>), GMP (Lin<sup>-</sup>Sca-1<sup>-</sup>c-Kit<sup>+</sup> CD34<sup>+</sup>FcγRII/III<sup>hi</sup>), CMP (Lin<sup>-</sup>Sca-1<sup>-</sup>c-Kit<sup>+</sup> CD34<sup>+</sup>FcγRII/III<sup>low</sup>), MEP (Lin<sup>-</sup>Sca-1<sup>-</sup>c-Kit<sup>+</sup> CD34<sup>low</sup>-FcγRII/III<sup>low</sup>-), LT-HSC (LSK Flt3<sup>-</sup>CD150<sup>+</sup>CD48<sup>-</sup>), MPP1 (LSK Flt3<sup>-</sup>CD150<sup>-</sup>CD48<sup>-</sup>), MPP2 (LSK Flt3<sup>-</sup>CD150<sup>+</sup>CD48<sup>+</sup>), MPP3 (LSK Flt3<sup>-</sup>CD150<sup>-</sup>CD48<sup>+</sup>) in gender- and age-matched *miR-142*<sup>-/-</sup> and *miR-142*<sup>+/+</sup> non-leukemic mice and *miR-142*<sup>-/-</sup>*BCR-ABL* and *miR-142*<sup>+/+</sup>*BCR-ABL* leukemic mice (measured at 4 weeks after BCR-ABL induction by tetracycline withdrawal). **b** Numbers of BM LSK, LT-HSC, MPP1, MPP2, MPP3, LMPP (LSK Flt3<sup>+</sup>CD150<sup>-</sup>), CLP (Flt3<sup>+</sup>IL-7Rα<sup>+</sup>Lin<sup>-</sup>Sca-1<sup>low</sup>c-Kit<sup>low</sup>), CMP, GMP, MEP, myeloid (CD11b<sup>+</sup>Gr-1<sup>+</sup>), B (B220<sup>+</sup>), T (CD3<sup>+</sup>) and erythroid (Ter119<sup>+</sup>) cells from one femur of gender- and age-matched *miR-142*<sup>-/-</sup> and *miR-142*<sup>+/+</sup> non-leukemic mice (n=10 mice per group) and *miR-142*<sup>-/-</sup>*BCR-ABL* and *miR-142*<sup>+/+</sup>*BCR-ABL* leukemic mice (measured at 4 weeks after BCR-ABL induction by tetracycline withdrawal, n=12 mice per group). **c** Numbers of spleen LSK, LT-HSC, MPP1, MPP2, MPP3, LMPP, CLP, CMP, GMP, MEP, myeloid, B, T and erythroid cells in the gender- and age-matched *miR-142*<sup>-/-</sup> and *miR-142*<sup>+/+</sup> non-leukemic mice (n=10 mice per group) and *miR-142*<sup>-/-</sup>*BCR-ABL* and *miR-142*<sup>+/+</sup>*BCR-ABL* leukemic mice (measured at 4 weeks after BCR-ABL induction by tetracycline withdrawal, n=12 mice per group). For **b-c**, source data are provided as a Source Data file. For **a**, results from one of the three independent experiments are shown (n=3). Abbreviations: *miR-142*<sup>+/+</sup>*B/A*: *miR-142*<sup>+/+</sup>*BCR-ABL*; *miR-142*<sup>-/-</sup>*B/A*: *miR-142*<sup>-/-</sup>*BCR-ABL*; BM: bone marrow; LT-HSC: long-term hematopoietic stem cells; MPP: multipotent progenitor; LMPP: lymphoid-primed MPP; CLP: common lymphoid progenitor; CMP: common myeloid progenitor; GMP: granulocyte/monocyte progenitor; MEP: megakaryocyte/erythroid progenitor. Comparison between groups was performed by two-tailed, unpaired t-test. Results shown represent mean ± SEM (standard error of the mean). Significance values: \*\*\*\*, p<0.0001; ns: not significant.

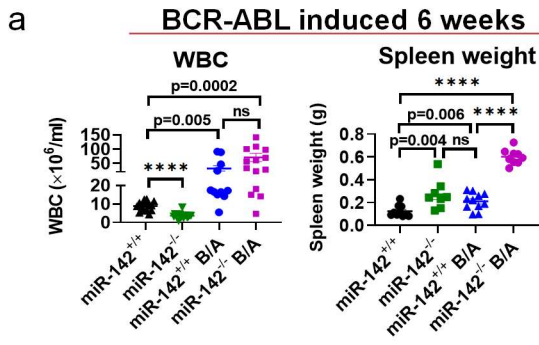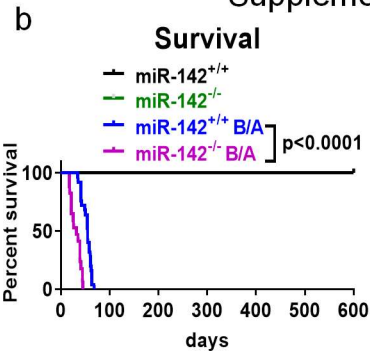

**c** **Mice are 40 weeks old** **Mice are moribund**  
(45 days after BCR-ABL induction)

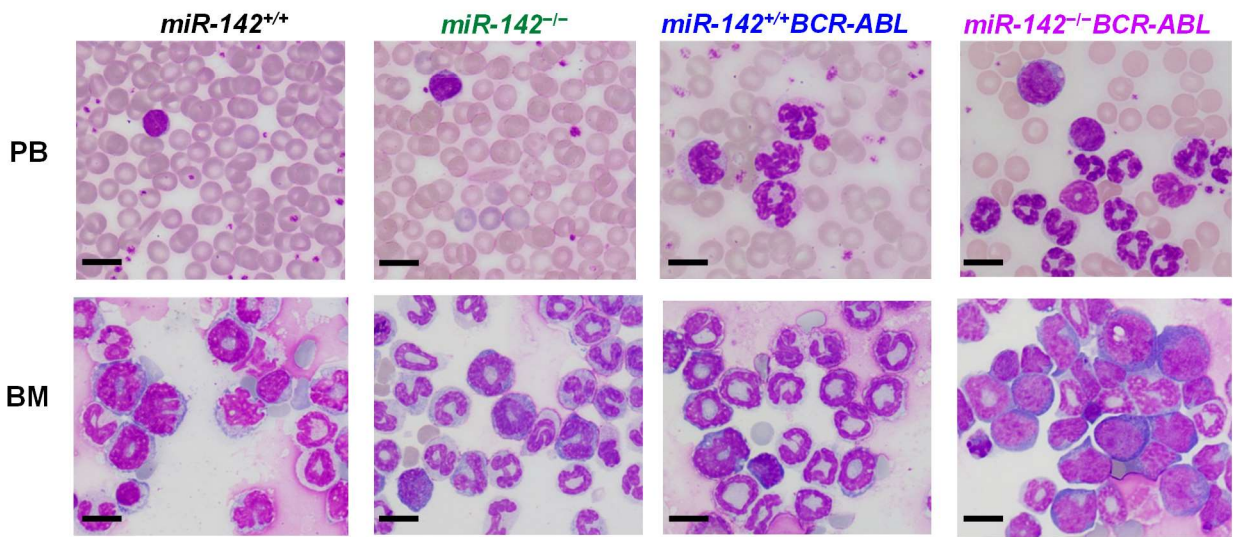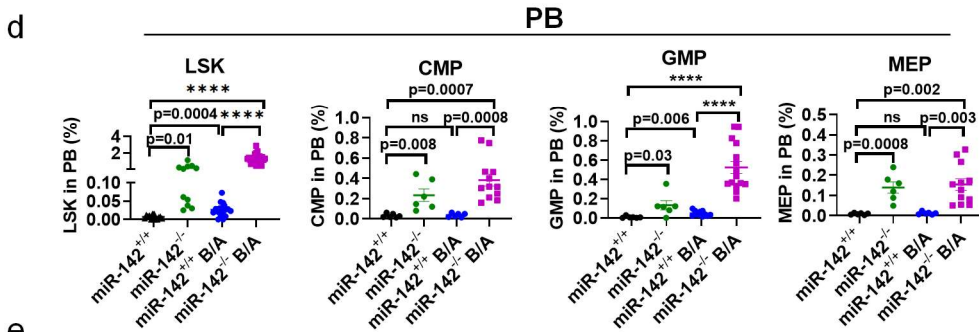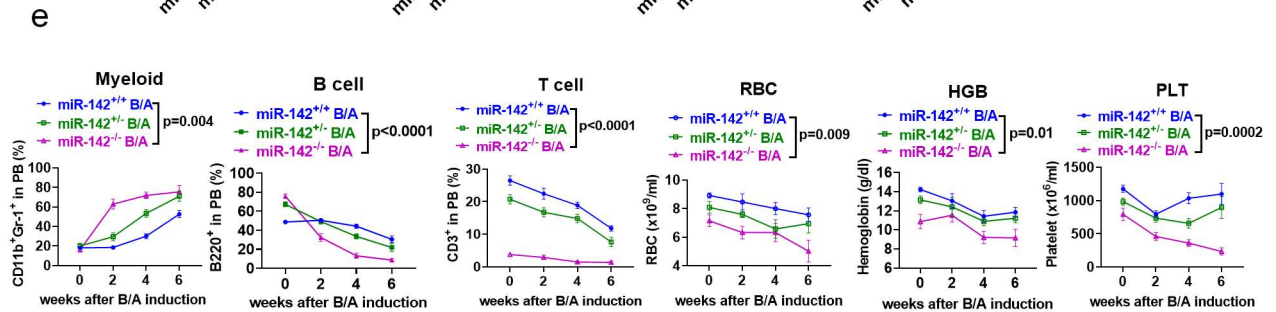

**Supplementary Fig. 2: Blood hematopoietic cell subpopulations in *miR-142<sup>-/-</sup>*, *miR-142<sup>+/+</sup>*, *miR-142<sup>-/-</sup>BCR-ABL*, and *miR-142<sup>+/+</sup>BCR-ABL* mice.** **a** White blood cell (WBC) counts (n=16 mice per group) and spleen weight (n=9 mice per group) of gender- and age-matched *miR-142<sup>-/-</sup>* and *miR-142<sup>+/+</sup>* non-leukemic mice and *miR-142<sup>-/-</sup>BCR-ABL* and *miR-142<sup>+/+</sup>BCR-ABL* leukemic mice, measured at 6 weeks after BCR-ABL induction by tetracycline withdrawal. **b** Survival of gender- and age-matched *miR-142<sup>-/-</sup>* and *miR-142<sup>+/+</sup>* non-leukemic mice (n=10 per group) and *miR-142<sup>-/-</sup>BCR-ABL* and *miR-142<sup>+/+</sup>BCR-ABL* leukemic mice (upon tetracycline withdrawal to induce BCR-ABL expression, n=17 per group). **c** Blood and BM smears from 40-week-old *miR-142<sup>-/-</sup>* and *miR-142<sup>+/+</sup>* non-leukemic mice and from moribund *miR-142<sup>-/-</sup>BCR-ABL* and *miR-142<sup>+/+</sup>BCR-ABL* leukemic mice at 45 days after BCR-ABL induction by tetracycline withdrawal, assessed by microscopy. Scale bar: 10µM. The experiment was repeated three times independently with similar results. **d** Percentage of PB LSK (Lin<sup>-</sup>Sca-1<sup>+</sup>c-Kit<sup>+</sup>), CMP (Lin<sup>-</sup>Sca-1<sup>-</sup>c-Kit<sup>+</sup> CD34<sup>+</sup>FcγRII/III<sup>low</sup>), GMP (Lin<sup>-</sup>Sca-1<sup>-</sup>c-Kit<sup>+</sup> CD34<sup>+</sup>FcγRII/III<sup>hi</sup>), and MEP (Lin<sup>-</sup>Sca-1<sup>-</sup>c-Kit<sup>+</sup> CD34<sup>low</sup>/FcγRII/III<sup>low</sup>) in gender- and age-matched *miR-142<sup>-/-</sup>* and *miR-142<sup>+/+</sup>* non-leukemic mice (n=6 per group) and *miR-142<sup>-/-</sup>BCR-ABL* (n=12) and *miR-142<sup>+/+</sup>BCR-ABL* (n=6) leukemic mice (measured at 4 weeks after BCR-ABL induction by tetracycline withdrawal), analyzed by flow cytometry. **e** PB myeloid (CD11b<sup>+</sup>Gr-1<sup>+</sup>), B (B220<sup>+</sup>) and T (CD3<sup>+</sup>) cell percentages by flow cytometry analysis, and red blood cell (RBC) counts, hemoglobin (HGB) and platelet (PLT) counts by HESKA-element-HT5, in gender-, age-, and BCR-ABL-level-matched *miR-142<sup>-/-</sup>BCR-ABL* (n=10), *miR-142<sup>+/-</sup>BCR-ABL* (n=11) and *miR-142<sup>+/+</sup>BCR-ABL* (n=15) mice measured before (0 weeks) and 2, 4 and 6 weeks after BCR-ABL induction by tetracycline withdrawal. For **a-b** and **d-e**, source data are provided as a Source Data file. For **c**, results from one of the three independent experiments are shown (n=3). Abbreviations: *miR-142<sup>+/+</sup>B/A*: *miR-142<sup>+/+</sup>BCR-ABL*; *miR-142<sup>-/-</sup>B/A*: *miR-142<sup>-/-</sup>BCR-ABL*; PB: peripheral blood; CMP: common myeloid progenitor; GMP: granulocyte/monocyte progenitor; MEP: megakaryocyte/erythroid progenitor. Comparison

between groups was performed by two-tailed, unpaired t-test. Results shown represent mean  $\pm$  SEM (standard error of the mean). Significance values: \*\*\*\*,  $p < 0.0001$ , ns: not significant.

Supplementary Fig. 3

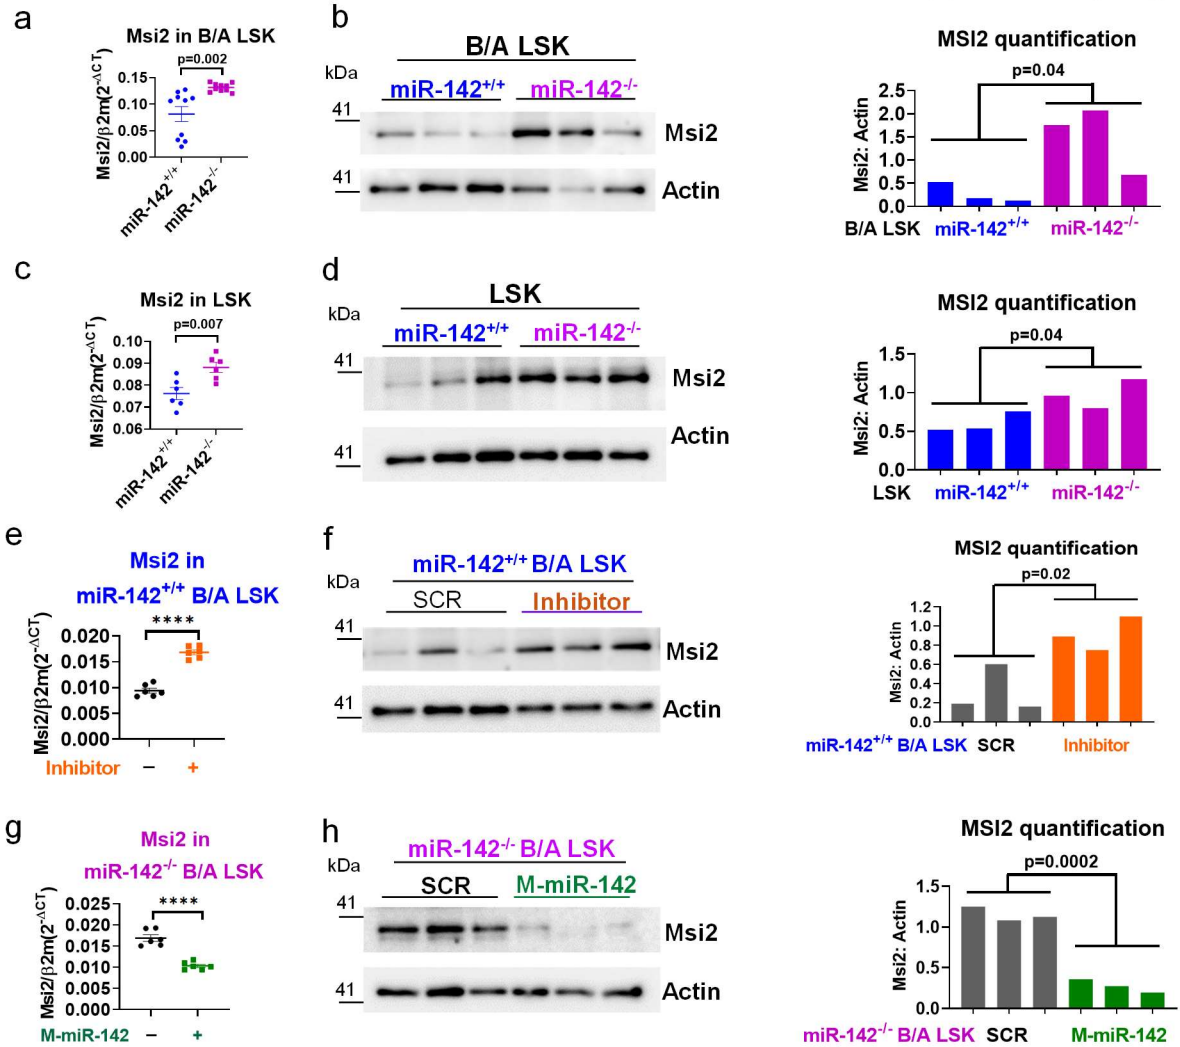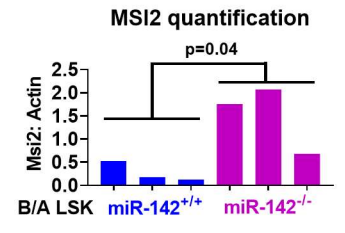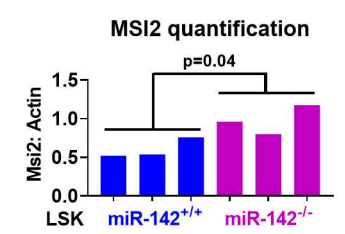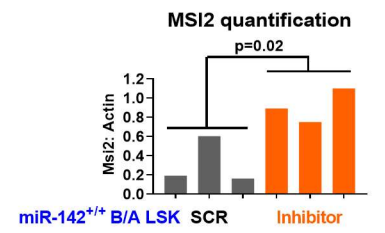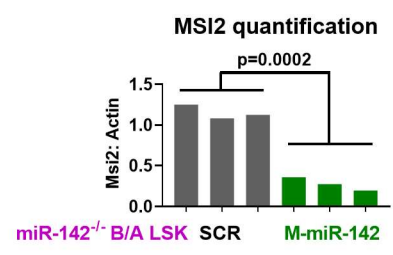

**i**

4343-4350 of **human** MSI2 3' UTR: 5' CCGUCCUGGGCACAGACACUACA  
 4442-4449 of **mouse** MSI2 3' UTR: 5' CAGUCCUGGGCACAGACACUACA  
 hsa- and mmu-miR-142a-3p.1 3' AGGUUUUCAUCCUUUGUGAUGU

4075-4082 of **human** MSI2 3' UTR: 5' AUUGUUUACAAAAGAAACACUAA  
 4145-4152 of **mouse** MSI2 3' UTR: 5' AUUGUUUACAAAAGAAACACUAA  
 hsa- and mmu-miR-142a-3p.2 3' AGGUUUUCAUCUUUGUGAUG

**Supplementary Fig. 3: MSI2 is a target of miR-142-3p.** **a-b** Msi2 mRNA (**a**, n=10 biologically independent samples) and protein (**b**; left, western blot results; right, MSI2 protein quantification; n=3 biologically independent samples) levels in LSKs from miR-142<sup>-/-</sup>BCR-ABL (BC CML) mice compared with those from miR-142<sup>+/+</sup>BCR-ABL (CP CML) mice. Source data are provided as a Source Data file. **c-d** Msi2 mRNA (**c**, n=6 biologically independent samples) and protein (**d**; left, western blot results; right, MSI2 protein quantification; n=3 biologically independent samples) levels in LSKs from miR-142<sup>-/-</sup> mice compared with those from miR-142<sup>+/+</sup> mice. Source data are provided as a Source Data file. **e-f** Msi2 mRNA (**e**, n=6 biologically independent samples) and protein (**f**; left, western blot results; right, MSI2 protein quantification; n=3 biologically independent samples) levels in LSKs from miR-142<sup>+/+</sup>BCR-ABL mice treated *in vitro* with miR-142 inhibitor (CpG-anti-miR-142 ODN) that downregulated miR-142 levels. Source data are provided as a Source Data file. **g-h** Msi2 mRNA (**g**, n=6 biologically independent samples) and protein (**h**; left, western blot results; right, MSI2 protein quantification; n=3 biologically independent samples) levels in LSKs from miR-142<sup>-/-</sup>BCR-ABL mice treated *in vitro* with miR-142 mimics (CpG-M-miR-142) that upregulated miR-142 levels. Source data are provided as a Source Data file. **i** A conserved 8mer miR-142-3p-binding site on the 3' UTR of human and mouse MSI2, highlighted in yellow, was shown by TargetScan (8.0). For **a-h**, source data are provided as a Source Data file. For **b**, **d**, **f**, **h**, results from one of the three independent experiments are shown (n=3). Abbreviations: B/A: BCR-ABL; LSK: Lin-Sca-1+c-Kit<sup>+</sup> cells. Comparison between groups was performed by two-tailed, unpaired t-test. Results shown represent mean ± SEM (standard error of the mean). Significance values: \*\*\*\*, p<0.0001.



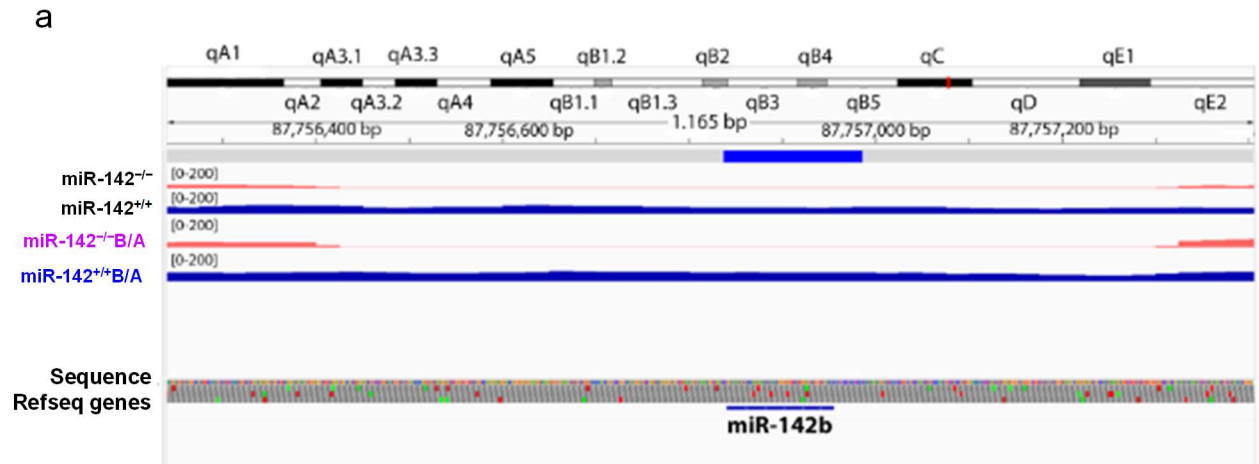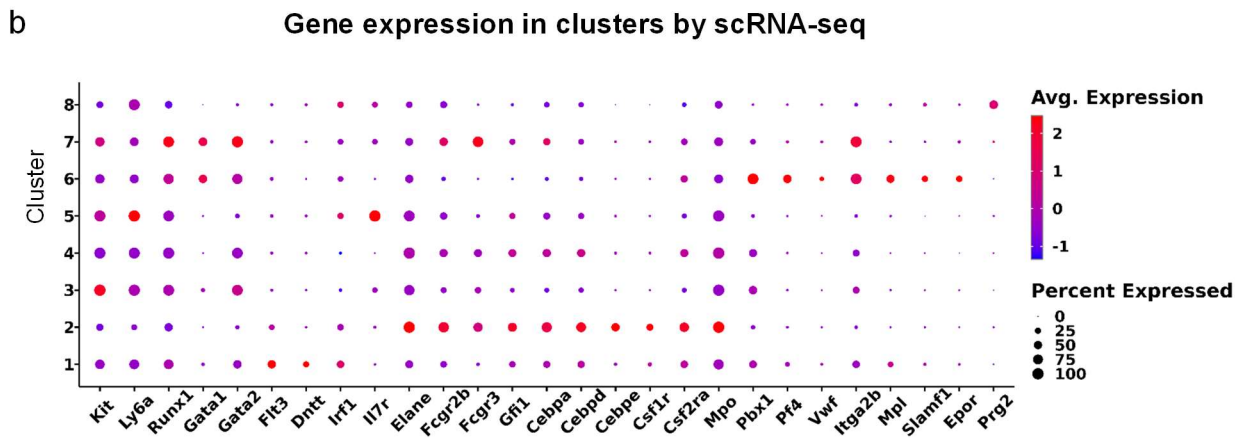

**c** Cluster identification of scRNA-seq and gene markers

| Cell Type                            | Cluster | Gene markers                                                                      |
|--------------------------------------|---------|-----------------------------------------------------------------------------------|
| Lymphoid-primed HSC                  | 1       | Flt3, Dntt, Irf1                                                                  |
| Myeloid/neutrophil-primed HSC        | 2       | Elane, Fcgr2b (CD32), Fcgr3 (CD16), Gfi1, Cebpa, Cebpd, Cebpe, Csf1r, Csf2ra, Mpo |
| Non-primed-1 HSC                     | 3       | Gata2, Kit <sup>high</sup> , Ly6a <sup>high</sup> , Runx1                         |
| Myeloid-primed HSC                   | 4       | Elane, Fcgr2b (CD32), Fcgr3 (CD16), Gfi1, Cebpa, Cebpd, Csf2ra                    |
| Myeloid/lymphoid-primed HSC          | 5       | Elane, Il7r                                                                       |
| Megakaryocyte-Erythrocyte-primed HSC | 6       | Pbx1, Pf4, Gata1, Gata2, Vwf, Itga2b (CD41), Mpl, Slamf1 (CD150), Epor            |
| Non-primed-2 HSC                     | 7       | Gata1, Gata2, Runx1, Itga2b(CD41)                                                 |
| Eosinophil-primed HSC                | 8       | Prg2                                                                              |

**Supplementary Fig. 4: DNA-sequencing and cluster identification of scRNA-seq of BM LSKs from *miR-142*<sup>-/-</sup>*BCR-ABL* vs *miR-142*<sup>+/+</sup>*BCR-ABL* mice.** **a** Integrative genomics viewer (IGV) screenshot showing deletion of *miR-142* loci in *miR-142*<sup>-/-</sup> and *miR-142*<sup>-/-</sup>*BCR-ABL* LSKs. Topmost bar is the copy number variant (CNV) summary track. LSK samples from *miR-142*<sup>-/-</sup> and *miR-142*<sup>-/-</sup>*BCR-ABL* mice are shown in red bars and LSKs from *miR-142*<sup>+/+</sup> and *miR-142*<sup>+/+</sup>*BCR-ABL* mice are shown in blue bars. The deleted CNV encompasses *Mir142b*. **b** Expression levels of selected genes in clusters identified by scRNA-seq. **c** Gene markers selected for each cluster and cluster identification of scRNA-seq. Abbreviations: *B/A*: *BCR-ABL*; scRNA-seq: single cell RNA sequencing.

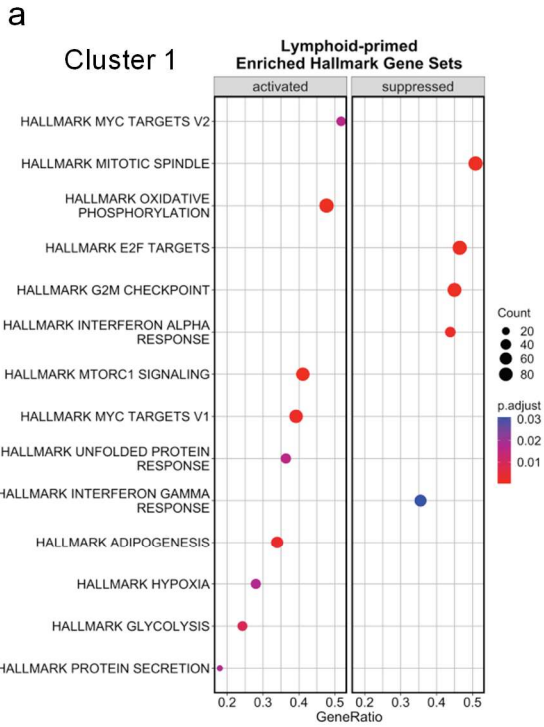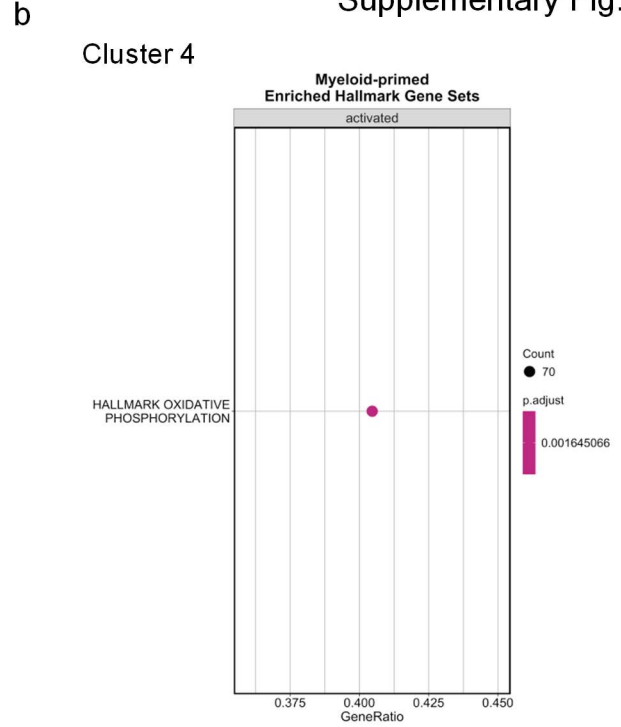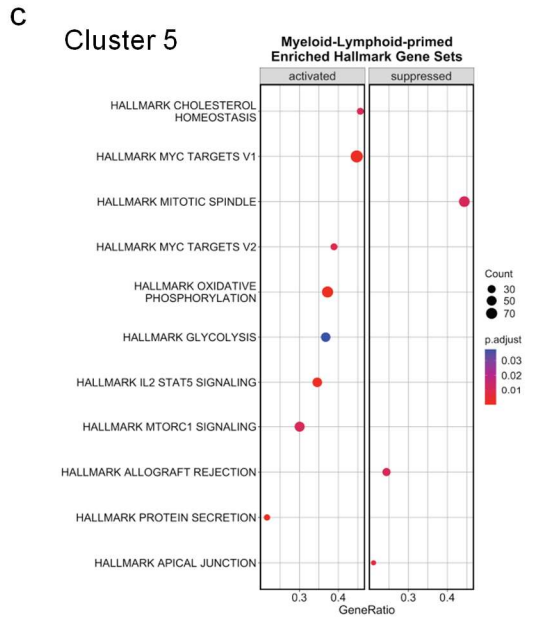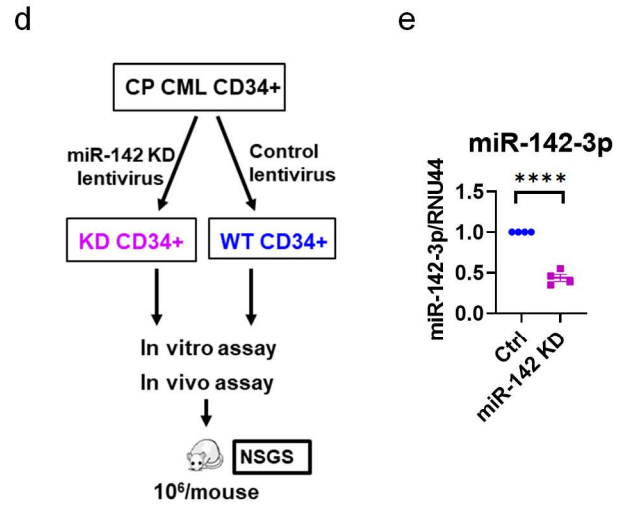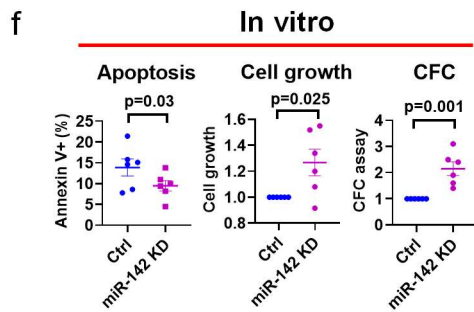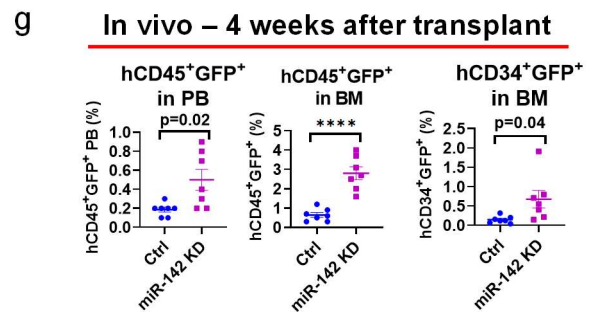

**Supplementary Fig. 5: GSEA of *miR-142*<sup>-/-</sup>*BCR-ABL* vs *miR-142*<sup>+/+</sup>*BCR-ABL* LSK clusters and *in vitro* and *in vivo* characterization of miR-142 KD primary CML CD34<sup>+</sup> cells.** **a-c** GSEA was performed on differentially expressed genes in clusters 1 (**a**), 4 (**b**) and 5 (**c**) from scRNA-seq of BM LSKs from *miR-142*<sup>-/-</sup>*BCR-ABL* and *miR-142*<sup>+/+</sup>*BCR-ABL* mice (BCR-ABL induced for 2 weeks). **d** Experimental design. **e** miR-142 expression in human CP CML CD34<sup>+</sup> cells transduced with GFP-expressing miR-142 KD or control lentiviruses (n=4 independent experiments). **f** Apoptosis, cell growth and colony forming cells (CFC) (n=6 independent experiments for all) in GFP<sup>+</sup> miR-142 KD CD34<sup>+</sup> cells or control CD34<sup>+</sup> cells after *in vitro* culture for 72 hours. **g** GFP<sup>+</sup> miR-142 KD CD34<sup>+</sup> CML cells or control cells were transplanted into immunodeficient NSG mice. Blood and BM engraftment rates (human CD45<sup>+</sup>GFP<sup>+</sup> cells) and BM LSC-enriched cell engraftment rates (human CD45<sup>+</sup>CD34<sup>+</sup>GFP<sup>+</sup> cells) were shown (n=7 mice per group). For **d-g**, source data are provided as a Source Data file. For **e-f**, results from one of the three independent experiments are shown (n=3). Abbreviations: GSEA: gene set enrichment analysis; CP: chronic phase; BM: bone marrow; GFP: green fluorescent protein; KD: knockdown; LSC: leukemia stem cells. Comparison between groups was performed by two-tailed, unpaired t-test. Results shown represent mean ± SEM (standard error of the mean). Significance values: \*\*\*\*, p<0.0001.

**a Oxidative phosphorylation**

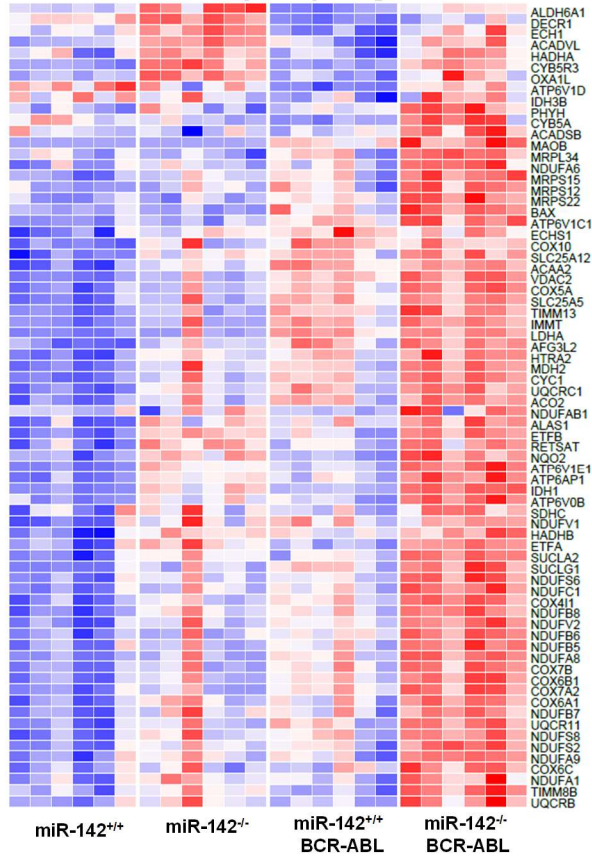

**b Protein secretion**

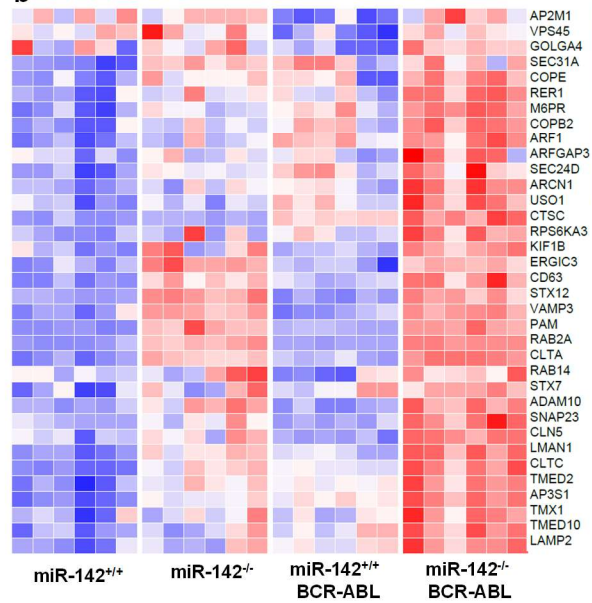

**c Adipogenesis**

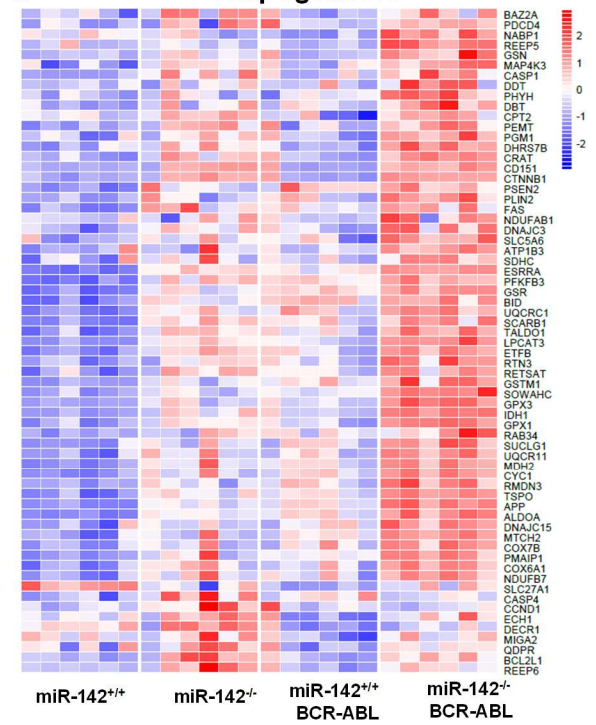

**d Glycolysis**

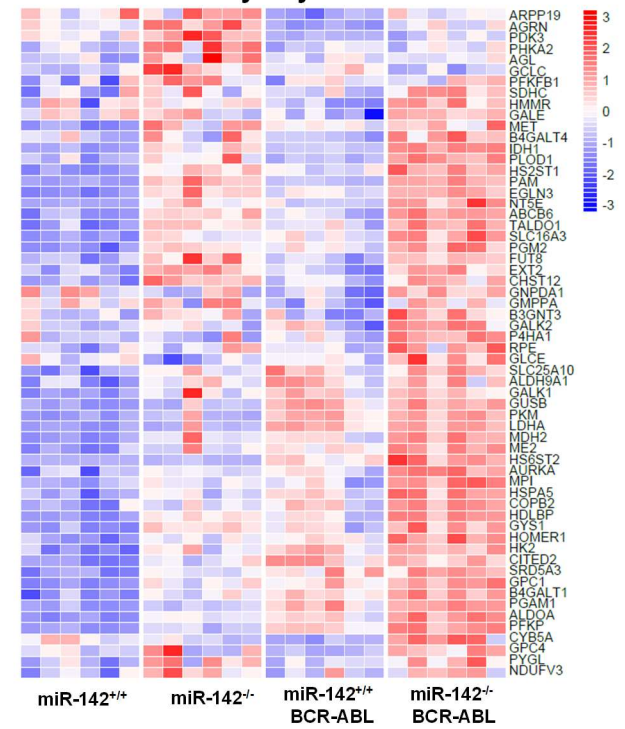

**Supplementary Fig. 6: Heatmap showing differentially expressed genes from the top four upregulated pathways in BC CML (*miR-142<sup>-/-</sup>BCR-ABL*) LSKs vs CP CML (*miR-142<sup>+/+</sup>BCR-ABL*) LSKs. **a-d** Heatmap of differentially expressed genes from the top four upregulated pathways in *miR-142<sup>-/-</sup>BCR-ABL* LSKs vs *miR-142<sup>+/+</sup>BCR-ABL* LSKs, i.e., oxidative phosphorylation (OxPhos; **a**), protein secretion (**b**), adipogenesis (**c**), and glycolysis (**d**) in BM LSKs from *miR-142<sup>+/+</sup>* (wt), *miR-142<sup>-/-</sup>* (miR-142 KO), *miR-142<sup>+/+</sup>BCR-ABL* (CP CML) and *miR-142<sup>-/-</sup>BCR-ABL* (BC CML) mice (n=6 mice per group). Abbreviations: CP: chronic phase; BC: blast crisis; BM: bone marrow; KO: knockout.**

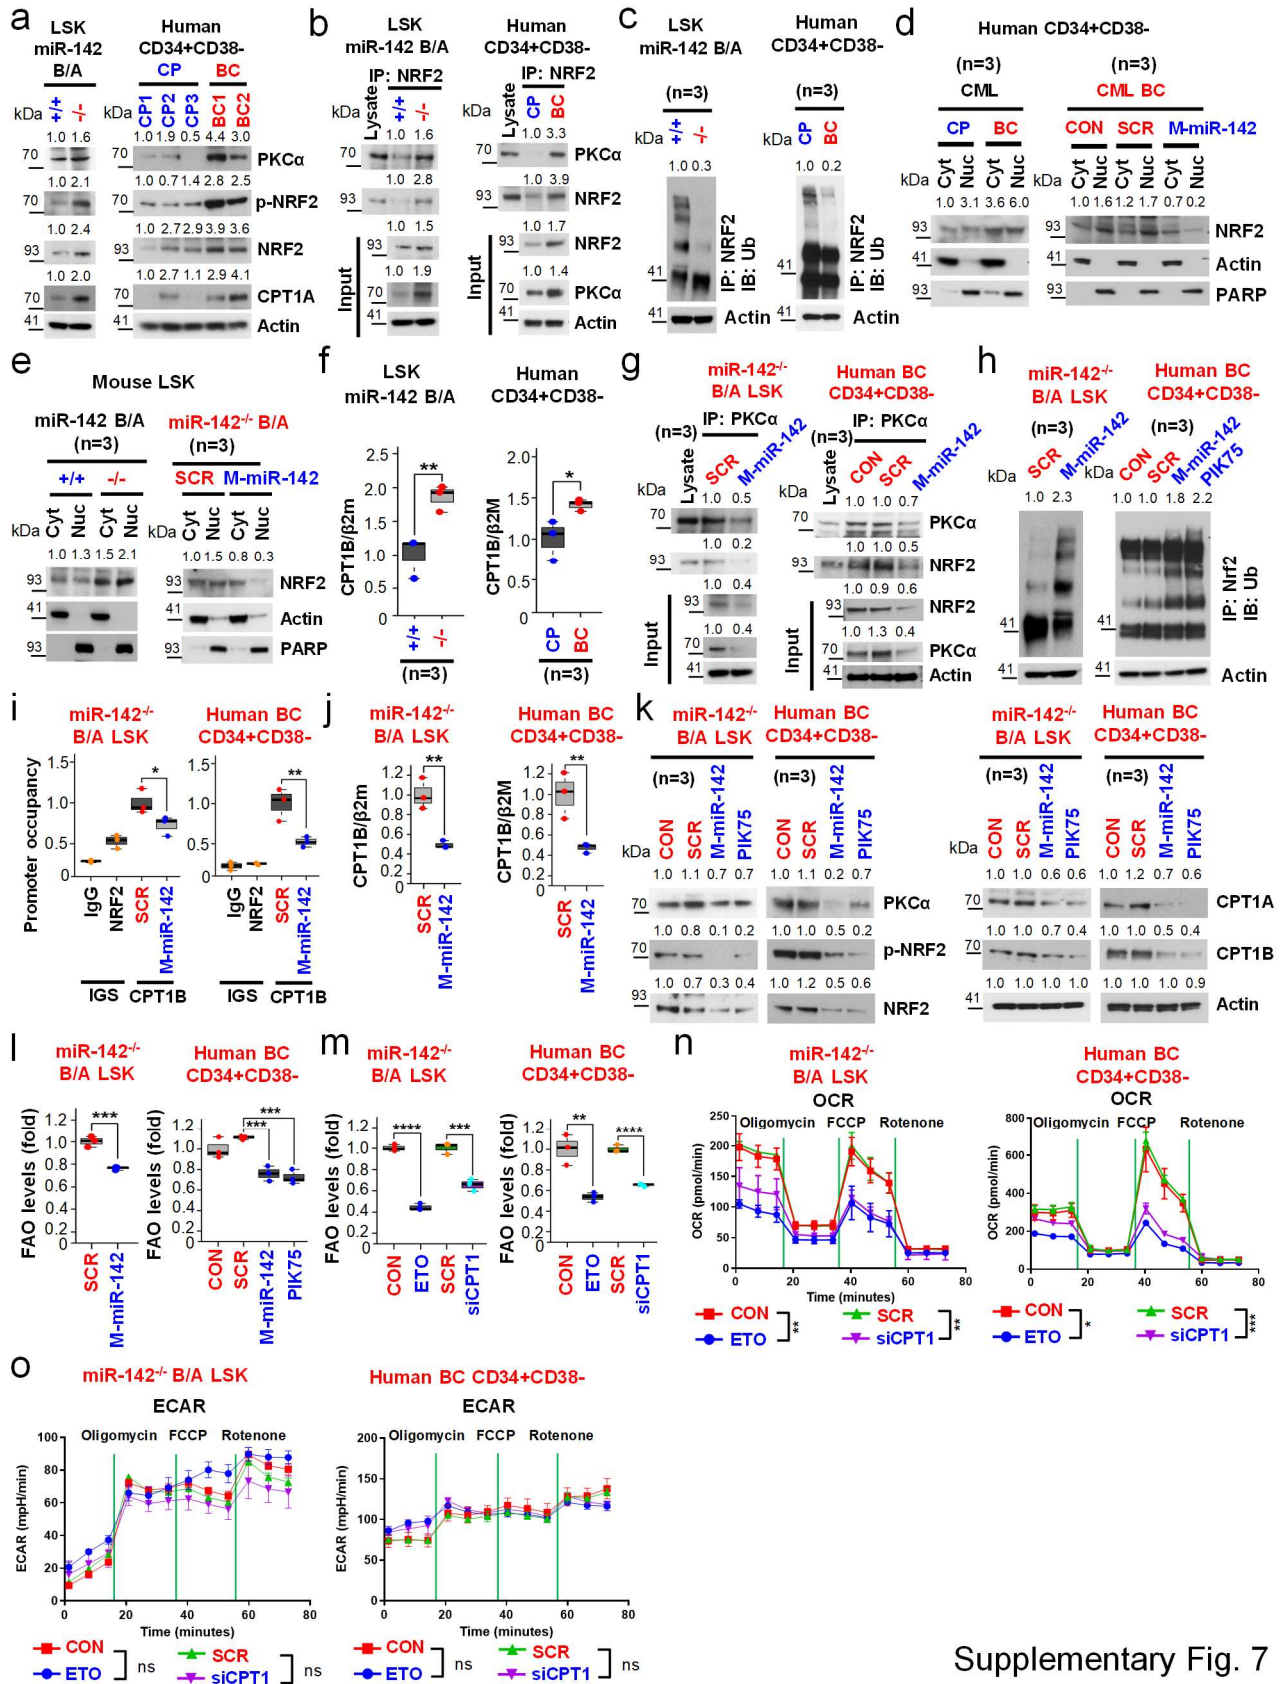

**Supplementary Fig. 7: Regulation of PKC $\alpha$ /NRF2/CPT1A-B axis by miR-142 in LSC-enriched cells.** **a** Effects of miR-142 expression on levels of PKC $\alpha$ , p-NRF2, and NRF2 protein. Lysates from *miR-142*<sup>+/+</sup> vs *miR-142*<sup>-/-</sup>BCR-ABL LSKs (**left**) or human CP vs BC CD34<sup>+</sup>CD38<sup>-</sup> CML cells (**right**) were immunoblotted with the indicated antibodies. Densitometry quantifications are shown by number (fold) on the top of blots. **b-c** Effects of miR-142 expression on NRF2/PKC $\alpha$  binding and NRF2 ubiquitination. Indicated lysates were subjected to immunoprecipitation with anti-NRF2 antibody and immunoblotted with anti-PKC $\alpha$  (**b**) or anti-ubiquitin (**c**) antibody. Three samples of each group were pooled for the assay (n=3). **d-e** Effects of miR-142 expression on cellular distribution of NRF2. Cellular fractionation was performed using CD34<sup>+</sup>CD38<sup>-</sup> cells from human CP vs BC CML patients (**d, left**) and LSKs from *miR-142*<sup>+/+</sup>BCR-ABL vs *miR-142*<sup>-/-</sup>BCR-ABL mice (**e, left**), or human BC CML CD34<sup>+</sup>CD38<sup>-</sup> cells (**d, right**) and mouse *miR-142*<sup>-/-</sup>BCR-ABL LSKs (**e, right**) treated with SCR control or CpG-M-miR-142 (2  $\mu$ M) for 24 hours. Indicated lysate was immunoblotted with anti-NRF2, anti-actin and anti-PARP antibodies. Three samples of each group were pooled for the assay (n=3). For **a-e**, results from one of the two independent experiments are shown. **f** Effects of miR-142 expression on levels of CPT1B mRNA (**left**,  $p = 0.0076$ ; **right**,  $p = 0.024$ ). Related to Figure 5c. mRNA was extracted from cells described in **b** and **c** and CPT1B mRNA was detected by qPCR. Three samples of each group were pooled for the assay (n=3). **g-i** Effects of correcting miR-142 deficit on PKC $\alpha$ /NRF2/CPT1B signaling and FAO levels. Mouse *miR-142*<sup>-/-</sup>BCR-ABL LSK (**left**) and human BC CML CD34<sup>+</sup>CD38<sup>-</sup> (**right**) cells were treated with SCR, CpG-M-miR-142 (2  $\mu$ M), or PKC $\alpha$  inhibitor-PIK75 (1  $\mu$ M) for 24 hours. **g** Levels of PKC $\alpha$ /NRF2 interaction by immunoprecipitation. **h** Levels of NRF2 ubiquitination. **i-j** Levels of NRF2/CPT1B promoter binding by CHIP assay (**left**,  $p = 0.033$ ; **right**,  $p = 0.0085$ ) and CPT1B mRNA by q-PCR (**left**,  $p = 0.0027$ ; **right**,  $p = 0.0084$ ). Box plot with median value and first/third quartiles and whiskers together with minimum and maximum values are shown. **k** Protein expression levels of PKC $\alpha$ , p-NRF2, NRF2, and CPT1A/B by immunoblotting. **l** Significant reduction in the levels of FAO were measured by the oxidation rate of 3H-palmitic acid (**left**,  $p =$



0.0006; **right**, SCR vs M-miR-142,  $p = 0.0007$  and SCR vs PIK75,  $p = 0.0003$ ). For **g-l**, three samples of each group were pooled for the assay ( $n=3$ ). **m-o** Effects of CPT1 inhibitor etomoxir (ETO) and CPT1A/B knockdown on FAO/OXPHOS. Mouse *miR-142<sup>-/-</sup>BCR-ABL* LSK (**left**) and human BC CML CD34<sup>+</sup>CD38<sup>-</sup> (**right**) cells were treated with DMSO vs ETO (5 $\mu$ M) or siSCR vs siCPT1A/B (each, 20nM) for 24 hours ( $n=3$  biologically independent samples). **m** Levels of FAO were measured by the oxidation rate of 3H-palmitic acid (**left**, CON vs ETO,  $p = 0.00001$  and SCR vs siCPT1,  $p = 0.0007$ ; **right**, CON vs ETO,  $p = 0.0033$  and SCR vs siCPT1,  $p = 0.00004$ ). **n-o** Levels of OCR and ECAR were measured by Seahorse XF Cell Mito Stress Test assay (**n**: **left**, CON vs ETO,  $p = 0.0077$  and SCR vs siCPT1,  $p = 0.0023$ ; **right**, CON vs ETO,  $p = 0.0142$  and SCR vs siCPT1,  $p = 0.0001$ ; **o**: not significant). For **a-o**, source data are provided as a Source Data file and results from one of the three independent experiments are shown ( $n=3$ ). Abbreviations: LSCs: leukemia stem cells; LSK; Lin<sup>-</sup>Sca-1<sup>+</sup>c-Kit<sup>+</sup>; miR-142<sup>+/+</sup>B/A: *miR-142<sup>+/+</sup>BCR-ABL*; miR-142<sup>-/-</sup>B/A: *miR-142<sup>-/-</sup>BCR-ABL*; CP: chronic phase; BC: blast crisis; ChIP; chromatin immunoprecipitation; FAO: fatty acid oxidation; OXPHOS: oxidative phosphorylation; M-miR-142: CpG-M-miR-142; Cyt: cytoplasm; Nuc: nucleus; ETO: etomoxir; DMSO: dimethyl sulfoxide; siCPT1: siCPT1A/B; OCR: oxygen consumption rate; ECAR: extracellular acidification rate; SCR: scramble; CON: control. Comparison between groups was performed by one-tailed, unpaired t-test. Results shown represent mean  $\pm$  SD (standard deviation). Significance values: \*,  $p < 0.05$ ; \*\*,  $p < 0.01$ ; \*\*\*,  $p < 0.001$ ; \*\*\*\*,  $p < 0.0001$ ; ns, not significant.

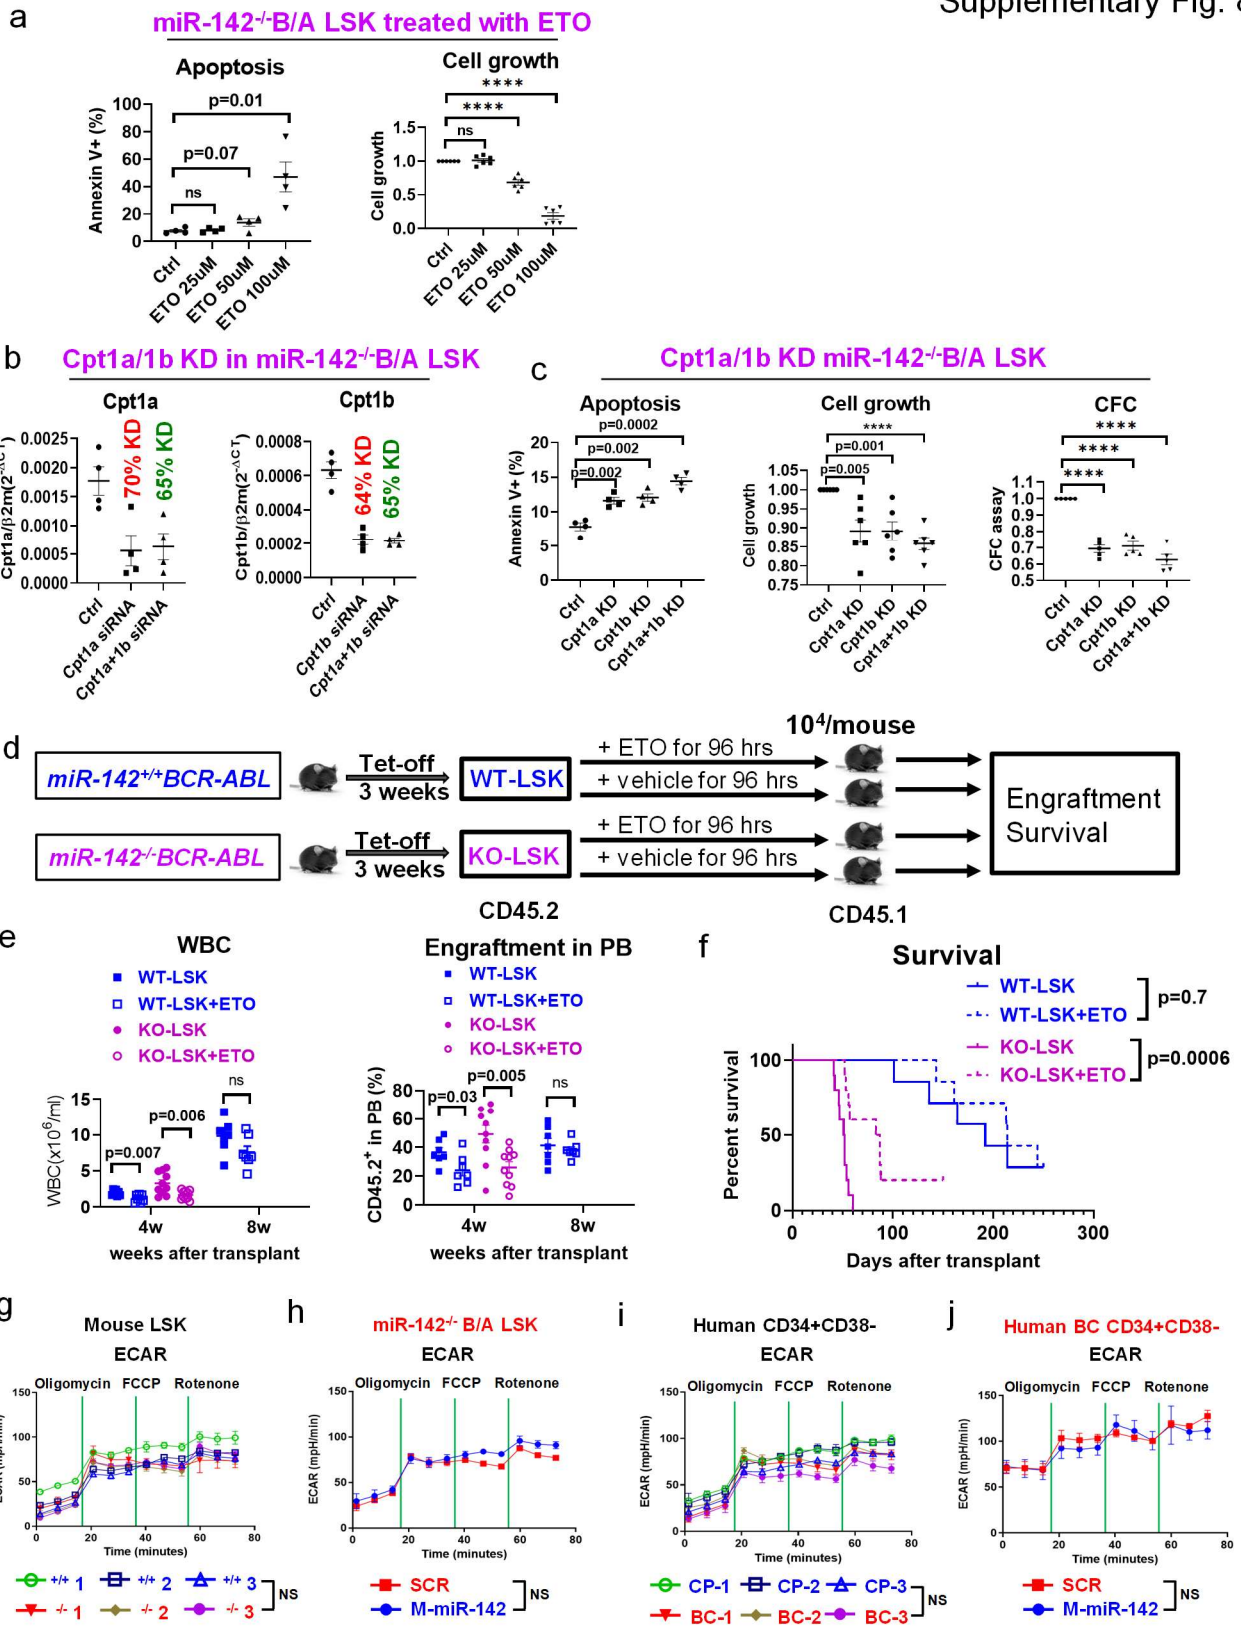

**Supplementary Fig. 8: Inhibition of FAO reduced self-renewal activity of LSC-enriched cells.** **a-c** *miR-142<sup>-/-</sup>BCR-ABL* LSKs (CPT1<sup>high</sup>) were treated with the CPT1 inhibitor ETO for 72 hours (**a**) or CTP1A/1B siRNAs to knock down CTP1A/1B (**b-c**). Cpt1a and Cpt1b levels by Q-RT-PCR (n=4 independent experiments), apoptosis by flow cytometry (n=4 independent experiments), cell growth (n=6 independent experiments), and/or colony-forming cells (CFC; n=5 independent experiments) were shown. **d** LSKs selected from *miR-142<sup>+/+</sup>BCR-ABL* or *miR-142<sup>-/-</sup>BCR-ABL* mice 3 weeks after BCR-ABL induction were treated ex vivo with ETO (50μM) or vehicle for 96 hours and then transplanted into congenic wt B6 mice via tail vein injection. **e-f** WBC counts, circulating engraftment rates at 4 weeks (**e**), and survival (**f**) of the recipients of ETO-treated *miR-142<sup>-/-</sup>BCR-ABL* LSKs compared to recipients of vehicle-treated *miR-142<sup>-/-</sup>BCR-ABL* LSKs (n=10 mice per group) were shown. **g-j** Levels of glycolysis (as indicated by ECAR levels) in LSKs isolated from *miR-142<sup>+/+</sup>BCR-ABL* vs *miR-142<sup>-/-</sup>BCR-ABL* mice and human CD34<sup>+</sup>CD38<sup>-</sup> cells from CP vs BC CML patients (**g** and **i**), or in murine *miR-142<sup>-/-</sup>BCR-ABL* LSK and human BC CML CD34<sup>+</sup>CD38<sup>-</sup> cells treated with SCR control or CpG-M-miR-142 (2 μM) (**h** and **j**). The levels of ECAR were measured by Seahorse XF Cell Mito Stress Test assay. Relative to Fig. **5d** and **5e**. For **a-c** and **e-j**, source data are provided as a Source Data file. For **g-j**, results from one of the three independent experiments are shown (n=3). Abbreviations: LSK; Lin<sup>-</sup>Sca-1<sup>+</sup>c-Kit<sup>+</sup>; ETO: etomoxir; CP: chronic phase; BC: blast crisis; WBC: white blood cells; ECAR: extracellular acidification rate; SCR: scramble. Comparison between groups was performed by two-tailed, unpaired t-test. Results shown represent mean ± SEM. Significance values: \*\*\*\*, p<0.0001; ns: not significant.

Supplementary Fig. 9

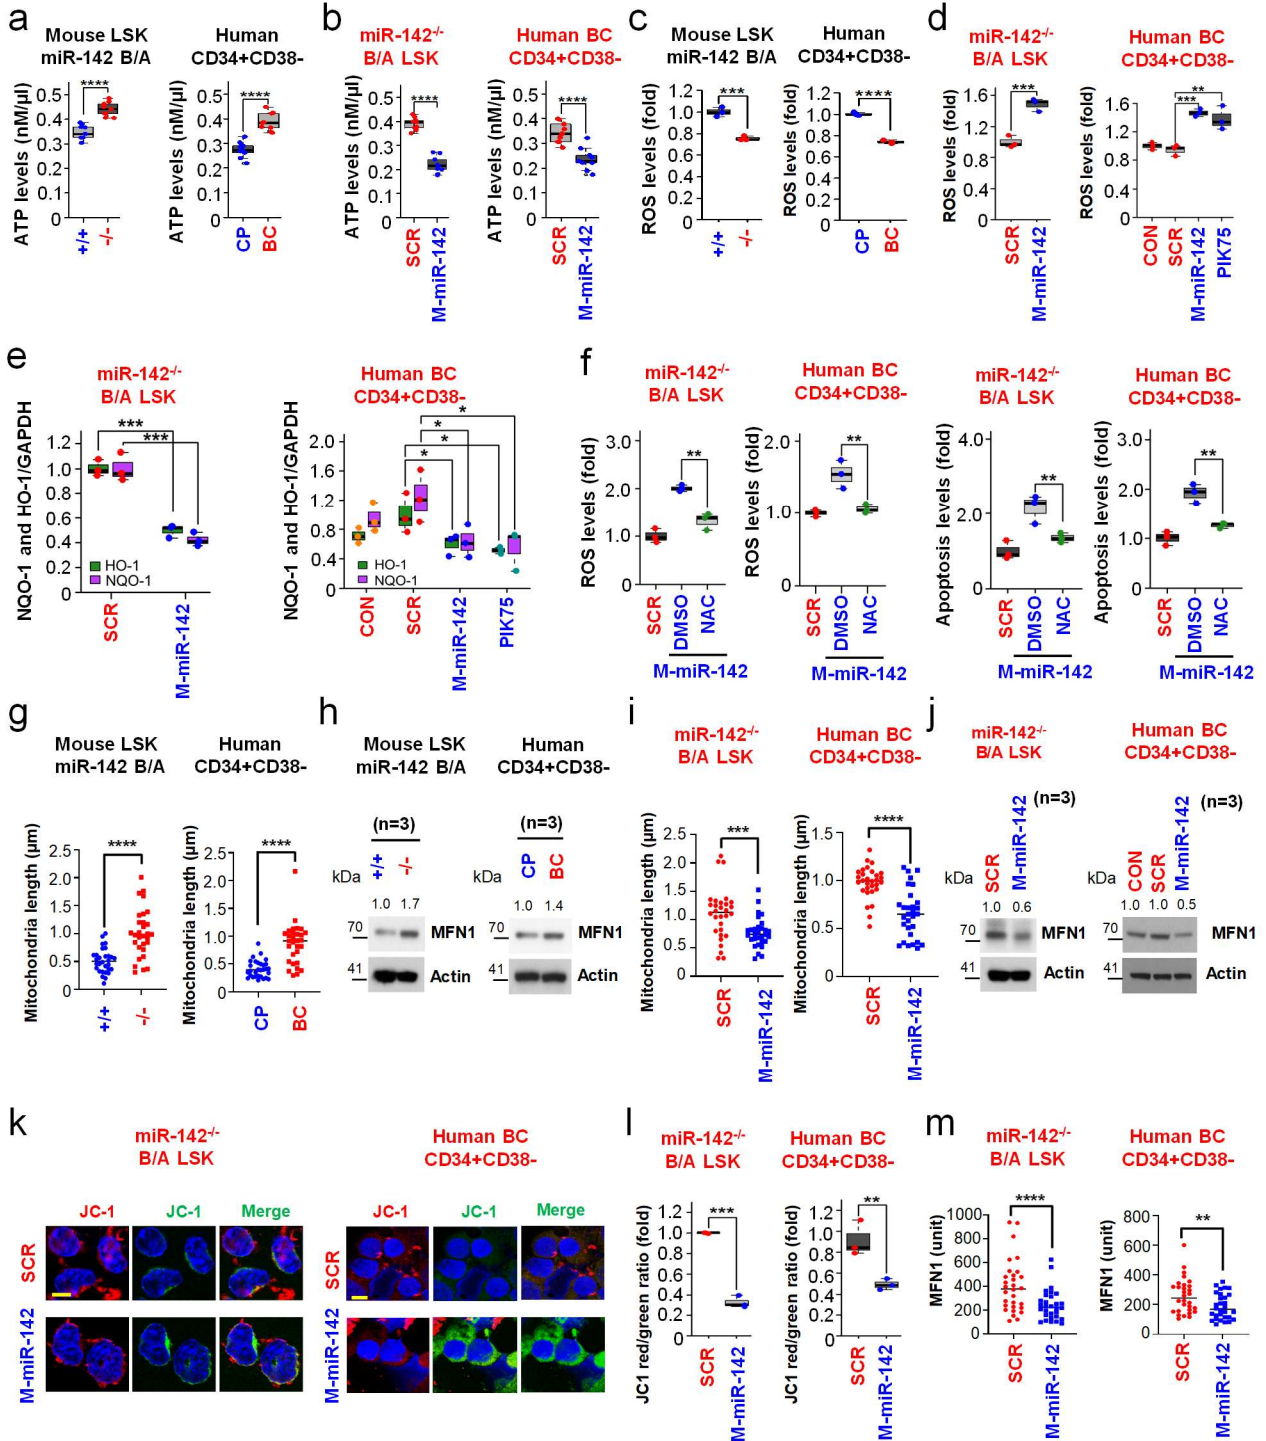

**Supplementary Fig. 9: Regulation of ROS levels and mitochondria fusion by miR-142 in LSC-enriched cells.** **a-b** Effects of miR-142 expression on ATP levels. **a** LSKs and CD34<sup>+</sup>CD38<sup>-</sup> cells were respectively isolated from *miR-142*<sup>+/+</sup>*BCR-ABL* vs *miR-142*<sup>-/-</sup>*BCR-ABL* mice or from human CP vs BC CML patients. **b** Mouse *miR-142*<sup>-/-</sup>*BCR-ABL* LSKs (**left**) or human CD34<sup>+</sup>CD38<sup>-</sup> BC CML cells (**right**) were treated with SCR control or CpG-M-miR-142 (2 μM) for 24 hours. **a-b** Levels of ATP were measured by ATP assay (**a: left**,  $p=2.00E-06$ ; **right**,  $p=1.78E-06$ ; **b: left**,  $p=1.37E-06$ ; **right**,  $p=4.36E-06$ ). **c-e** Effects of miR-142 expression on NRF2-regulated HO-1/NQO-1 and ROS levels. **c** LSKs and CD34<sup>+</sup>CD38<sup>-</sup> cells were respectively isolated from *miR-142*<sup>+/+</sup>*BCR-ABL* vs *miR-142*<sup>-/-</sup>*BCR-ABL* mice or from human CP vs BC CML patients. **d,e** Mouse *miR-142*<sup>-/-</sup>*BCR-ABL* LSKs (**left**) or human CD34<sup>+</sup>CD38<sup>-</sup> BC CML cells (**right**) were treated with SCR control, CpG-M-miR-142 (2 μM), or PIK75 (1μM) for 24 hours. **c,d** ROS levels were measured by flow cytometry with mitoSox staining (**c: left**,  $p=0.0005$ ; **right**,  $p=1.78E-05$ ); (**d: left**,  $p=0.0009$ ; **right**, SCR vs M-miR-142,  $p=0.0003$  and SCR vs PIK75,  $p=0.0071$ ). **e** HO-1/NQO-1 mRNA was measured by q-PCR (**Left: HO-1**,  $p=0.0007$  and NQO-1,  $p=0.0007$ ; **Right: HO-1**, SCR vs M-miR-142,  $p=0.0451$  and SCR vs PIK75,  $p=0.0195$ ; NQO-1, SCR vs M-miR-142,  $p=0.0339$  and SCR vs PIK75,  $p=0.0286$ ). **f** Effects of *N*-acetyl-l-cysteine (NAC) on M-miR-142 increased ROS and apoptosis. Mouse *miR-142*<sup>-/-</sup>*BCR-ABL* LSKs (**left**) or human CD34<sup>+</sup>CD38<sup>-</sup> BC CML cells (**right**) were treated with SCR control or CpG-M-miR-142 (2 μM) in the presence of DMSO or NAC (1mM) for 24 hours. Levels of ROS (**left**, mouse LSK,  $p=0.0014$  and human CD34<sup>+</sup>CD38<sup>-</sup> cells,  $p=0.0074$ ) and apoptosis (**right**, mouse LSK,  $p=0.0015$  and human CD34<sup>+</sup>CD38<sup>-</sup> cells,  $p=0.0024$ ) were measured by flow cytometry with mitoSox and annexin V staining. **a-f** Box plot with median value and first/third quartiles and whiskers together with minimum and maximum values are shown. **g-j** Effects of miR-142 expression on mitochondria fusion and levels of MFN1 protein. **g,h** LSKs (**left**) and CD34<sup>+</sup>CD38<sup>-</sup> cells (**right**) were respectively isolated from *miR-142*<sup>+/+</sup>*BCR-ABL* vs *miR-142*<sup>-/-</sup>*BCR-ABL* mice or from human CP vs BC CML patients. **i,j** Mouse *miR-142*<sup>-/-</sup>*BCR-ABL* LSKs (**left**) or human CD34<sup>+</sup>CD38<sup>-</sup> BC CML cells (**right**)

were treated with SCR control or CpG-M-miR-142 (2  $\mu$ M) for 24 hours. **g,i** Quantification of mitochondria length (**g: left**,  $p=6.29E-07$ ; **right**,  $p=1.67E-07$ ; **i: left**,  $p=0.0006$ ; **right**,  $p=2.26E-07$ ). Related to Fig. **5f-i**. **h,j** Cell lysates were immunoblotted with anti-MFN1 and anti-actin antibodies. Three samples of each group were pooled for the assay ( $n=3$ ). Densitometry quantifications are shown by number (fold) on the top of blots. **k-l** Effects of miR-142 expression on mitochondrial membrane potential. Murine *miR-142<sup>-/-</sup>BCR-ABL* LSK (**left**) and human BC CML CD34<sup>+</sup>CD38<sup>-</sup> cells (**right**) were treated with SCR or CpG-M-miR-142 (2  $\mu$ M) for 24 hours. Mitochondrial membrane potential was measured by staining of the treated cells with JC-1 dye. JC-1 dye exhibits potential-dependent accumulation in mitochondria, indicated by a green fluorescence emission at (~529 nm) for the monomeric form of the probe, which shifts to red (~590 nm) with a concentration-dependent formation of red fluorescent J-aggregates. Mitochondrial depolarization is indicated by a decrease in the red/green fluorescence intensity ratio. **k** Represent images of JC-1 staining. Scale bar, 10  $\mu$ m. **l** Quantification of JC-1 (red/green) fluorescence intensity (**left**,  $p=1.92E-05$ ; **right**,  $p=0.0072$ ). Box plot with median value and first/third quartiles and whiskers together with minimum and maximum values are shown. **m** Effects of miR-142 expression on MFN1 expression. Murine *miR-142<sup>-/-</sup>BCR-ABL* LSK (**left**) and human BC CML CD34<sup>+</sup>CD38<sup>-</sup> cells (**right**) were treated with SCR or CpG-M-miR-142 (2  $\mu$ M) for 24 hours. MFN1 protein was visualized by images of immunolabeling-electron microscope (Fig. **5j-k**) and quantification of MFN1 expression was shown by counting from 30 mitochondria in random fields (**left**,  $p=7.34E-04$ ; **right**,  $p=0.0046$ ). For **a-j** and **l-m**, source data are provided as a Source Data file. For **a-m**, results from one of the three independent experiments are shown ( $n=3$ ). Abbreviations: LSCs: leukemia stem cells; ATP: adenosine 5'-triphosphate; LSK: Lin<sup>-</sup>Sca-1<sup>+</sup>c-Kit<sup>+</sup>; miR-142<sup>+/+</sup>B/A: *miR-142<sup>+/+</sup>BCR-ABL*; miR-142<sup>-/-</sup>B/A: *miR-142<sup>-/-</sup>BCR-ABL*; CP: chronic phase, BC: blast crisis; M-miR-142: CpG-M-miR-142; ROS: reactive oxygen species; NAC: *N*-acetyl-L-cysteine; SCR: scramble; DMSO: dimethyl sulfoxide. Comparison between groups was

performed by one-tailed, unpaired t-test. Results shown represent mean  $\pm$  SD. Significance values: \*,  $p < 0.05$ ; \*\*,  $p < 0.01$ ; \*\*\*,  $p < 0.001$ ; \*\*\*\*,  $p < 0.0001$ ; ns, not significant.

Supplementary Fig. 10

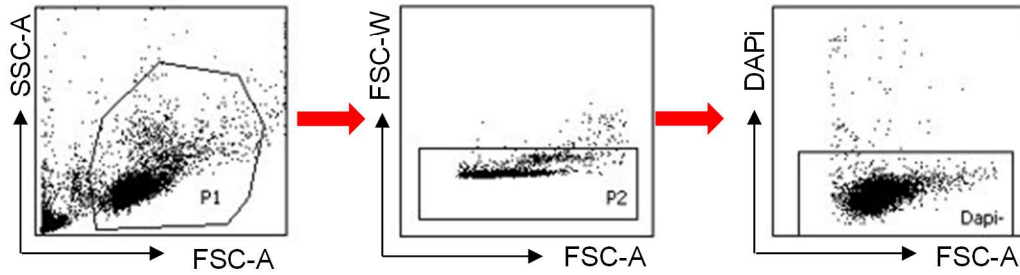

**Supplementary Fig. 10: Gating strategy for flow cytometry analysis.** All samples were FSC-A and SSC-A gated, followed by FSC-A/FSC-W gating to select singlet cells. DAPI negative cells were then gated for subsequent relevant gating, shown in the main figures or supplementary figures.



**Supplementary table 1. Comparison of hematopoietic cell subpopulations in PB, BM and spleen in miR-142 KO BCR-ABL vs miR-142 WT BCR-ABL, and in miR-142 KO vs WT mice.**

| Cells              | Immunophenotypes                                                                                         | miR-142 <sup>-/-</sup> B/A vs miR-142 <sup>+/+</sup> B/A |    |        | miR-142 <sup>-/-</sup> vs miR-142 <sup>+/+</sup> |    |        |
|--------------------|----------------------------------------------------------------------------------------------------------|----------------------------------------------------------|----|--------|--------------------------------------------------|----|--------|
|                    |                                                                                                          | PB                                                       | BM | Spleen | PB                                               | BM | Spleen |
| <b>LSK</b>         | Lineage (Lin) <sup>-</sup> Sca-1 <sup>+</sup> c-Kit <sup>+</sup>                                         | ↑                                                        | ↑  | ↑      | ↑                                                | ↑  | ↑      |
| <b>LT-HSC</b>      | FIt3 <sup>-</sup> CD150 <sup>+</sup> CD48 <sup>-</sup> LSK                                               | n/a                                                      | ↓  | =      | n/a                                              | ↓  | ↑      |
| <b>MPP1</b>        | FIt3 <sup>-</sup> CD150 <sup>-</sup> CD48 <sup>-</sup> LSK                                               | n/a                                                      | =  | ↑      | n/a                                              | ↑  | ↑      |
| <b>MPP2</b>        | FIt3 <sup>-</sup> CD150 <sup>+</sup> CD48 <sup>+</sup> LSK                                               | n/a                                                      | =  | ↑      | n/a                                              | ↑  | ↑      |
| <b>MPP3</b>        | FIt3 <sup>-</sup> CD150 <sup>-</sup> CD48 <sup>+</sup> LSK                                               | ↑                                                        | ↑  | ↑      | ↑                                                | ↑  | ↑      |
| <b>LMPP</b>        | FIt3 <sup>+</sup> CD150 <sup>-</sup> LSK                                                                 | ↑                                                        | =  | ↑      | n/a                                              | ↑  | ↑      |
| <b>CLP</b>         | IL-7Rα <sup>+</sup> Lin <sup>-</sup> Sca-1 <sup>low</sup> c-Kit <sup>low</sup>                           | n/a                                                      | =  | ↑      | n/a                                              | ↑  | =      |
| <b>CMP</b>         | Lin <sup>-</sup> Sca-1 <sup>-</sup> c-Kit <sup>+</sup> CD34 <sup>+</sup> FcγRII/III <sup>low</sup>       | ↑                                                        | =  | =      | ↑                                                | =  | ↑      |
| <b>GMP</b>         | Lin <sup>-</sup> Sca-1 <sup>-</sup> c-Kit <sup>+</sup> CD34 <sup>+</sup> FcγRII/III <sup>hi</sup>        | ↑                                                        | ↑  | ↑      | ↑                                                | ↑  | ↑      |
| <b>MEP</b>         | Lin <sup>-</sup> Sca-1 <sup>-</sup> c-Kit <sup>+</sup> CD34 <sup>low/-</sup> FcγRII/III <sup>low/-</sup> | ↑                                                        | ↓  | =      | ↑                                                | ↓  | ↑      |
| <b>Myeloid</b>     | CD11b+Gr-1+                                                                                              | ↑                                                        | =  | ↑      | ↑                                                | ↑  | ↑      |
| <b>B</b>           | B220+                                                                                                    | ↓                                                        | =  | ↑      | =                                                | =  | ↑      |
| <b>T</b>           | CD3+                                                                                                     | ↓                                                        | ↓  | ↓      | ↓                                                | ↓  | ↓      |
| <b>Erythrocyte</b> | Ter119+                                                                                                  | ↓                                                        | ↓  | ↑      | ↓                                                | ↓  | ↑      |

LT-HSC: long term hematopoietic stem cell; MPP: multipotent progenitors; LMPP: lymphoid-primed MPP; CLP: common lymphoid progenitor; CMP: common myeloid progenitor; GMP: granulocyte-macrophage progenitor; MEP: megakaryocyte-erythrocyte progenitor; B/A: BCR-ABL; Arrows represent relative cell type levels in miR-142<sup>-/-</sup> B/A vs miR-142<sup>+/+</sup> B/A mice or in miR-142<sup>-/-</sup> vs miR-142<sup>+/+</sup> mice.

**Supplementary Table 2: Summary of compounds detected in untargeted metabolomics of miR-142-/-BCR-ABL (BC CML) and miR-142+/+BCR-ABL (CP CML) study cohort.**

|                    | HILICpos | HILICneg | RPpos    | RPneg    | Combined |
|--------------------|----------|----------|----------|----------|----------|
| Compounds          | 1577     | 1116     | 3696     | 5010     | 11399    |
| Annotated          | 546      | 327      | 826      | 425      | 2124     |
| PoolQC(Area)       | ≤25%CV   | ≤25%CV   | ≤25%CV   | ≤25%CV   | -        |
| Mass error (ppm)   | ±5ppm    | ±5ppm    | ±5ppm    | ±5ppm    | -        |
| RT tolerance (min) | ≤0.2 min | ≤0.2 min | ≤0.2 min | ≤0.2 min | -        |

**Supplementary Table 3: Metabolic ratios of miR-142<sup>-/-</sup>BCR-ABL (KO) and miR-142<sup>+/+</sup>BCR-ABL (WT) cells. Ratios were compared using a two-sided Student's t-test.**

| Comparison             | Mean KO Ratio | Mean WT Ratio | KO/WT       | p value |
|------------------------|---------------|---------------|-------------|---------|
| NAD <sup>+</sup> /NADH | 1.8095722     | 0.745690113   | 2.426708048 | 0.01842 |
| GSSG/GSH               | 0.261395837   | 0.89881819    | 0.290821704 | 0.07313 |

**Supplementary Table 4. Reagents or resources used in this study.**

**Antibodies for flow cytometry analysis**

| <b>Anti-human antibodies</b> |               |                     |               |            |
|------------------------------|---------------|---------------------|---------------|------------|
| <b>Name</b>                  | <b>color</b>  | <b>manufacturer</b> | <b>clone</b>  | <b>cat</b> |
| CD34                         | PE-Cy7        | eBioscience         | 4H11          | 25-0349-42 |
| CD34                         | FITC          | Invitrogen          | 4H11          | 11-0349-42 |
| CD34                         | APC           | Becton Dickenson    | 4H11          | 17-0349-42 |
| CD38                         | PE            | Becton Dickenson    | HIT2          | 12-0389-42 |
| CD38                         | APC           | Becton Dickenson    | HB7           | 340439     |
| CD38                         | APC-eflu780   | eBioscience         | HIT2          | 47-0389-42 |
| CD45                         | APC           | Becton Dickenson    | HI30          | 555485     |
| CD45                         | FITC          | Becton Dickenson    | HI30          | 304038     |
| CD45                         | APC-eflu780   | eBioscience         | 30-F11        | 47-0451-82 |
| CD33                         | PE            | Becton Dickenson    | WM53          | 555450     |
| <b>Anti-mouse antibodies</b> |               |                     |               |            |
| <b>Name</b>                  | <b>color</b>  | <b>manufacturer</b> | <b>clone</b>  | <b>cat</b> |
| CD3e                         | biotinylated  | eBioscience         | 145-2c11      | 13-0031-85 |
| CD4                          | biotinylated  | eBioscience         | GK1.5         | 13-0041-85 |
| CD8a                         | biotinylated  | eBioscience         | 53-6.7        | 13-0081-85 |
| B220                         | biotinylated  | eBioscience         | RA3-6B2       | 13-0452-85 |
| CD19                         | biotinylated  | eBioscience         | eBio1D3 (1D3) | 13-0193-85 |
| IgM                          | biotinylated  | eBioscience         | II/41         | 13-5790-85 |
| Gr-1                         | biotinylated  | eBioscience         | RB6-8C5       | 13-5931-85 |
| CD11b                        | biotinylated  | eBioscience         | M1/70         | 13-0112-85 |
| NK1.1                        | biotinylated  | eBioscience         | PK136         | 13-5941-85 |
| Ter119                       | biotinylated  | eBioscience         | TER-119       | 13-5921-85 |
| FIt3                         | biotinylated  | eBioscience         | A2F10         | 13-1351-85 |
| IL-7R $\alpha$               | biotinylated  | eBioscience         | A7R34         | 13-1271-85 |
| Sca-1                        | PE-Cy7        | eBioscience         | D7            | 25-5981-82 |
| Sca-1                        | PE            | eBioscience         | D7            | 12-5981-83 |
| Sca-1                        | FITC          | eBioscience         | D7            | 11-5981-85 |
| CD117 (c-Kit)                | APC-efluor780 | eBioscience         | ACK2          | 47-1172-82 |
| CD117 (c-Kit)                | APC-efluor780 | eBioscience         | 2B8           | 47-1171-82 |
| CD16/CD32                    | PE-Cy7        | eBioscience         | 93            | 25-0161-82 |
| CD16/CD32                    | PE-Cy7        | Becton Dickenson    | 2.4G2         | 560829     |
| CD34                         | eFluor 660    | eBioscience         | RAM34         | 50-0341-82 |
| CD34                         | Alexa647      | biolegend           | MEC14.7       | 119314     |
| CD150                        | PE            | eBioscience         | mshad150      | 12-1502-82 |
| CD150                        | PE            | Biolegend           | TC15-12F12.2  | 115904     |

|                         |                 |                  |              |            |
|-------------------------|-----------------|------------------|--------------|------------|
| CD150                   | PerCP-Cy5.5     | Biolegend        | TC15-12F12.2 | 115922     |
| CD48                    | APC             | eBioscience      | HM48-1       | 17-0481-82 |
| CD48                    | Pacific blue    | Biolegend        | HM48-1       | 103418     |
| FLT3                    | PE              | Invitrogen       | A2F10        | 12-1351-82 |
| FLT3                    | BV421           | Biolegend        | A2F10        | 135315     |
| IL-7R $\alpha$          | BV421           | Biolegend        | A7R34        | 135027     |
| IL-7R $\alpha$          | FITC            | eBioscience      | A7R34        | 11-1271-82 |
| CD45                    | APC-eFluor780   | eBioscience      | 30-F11       | 47-0451-80 |
| CD45                    | FITC            | eBioscience      | 30-F11       | 11-0451-85 |
| CD45                    | PE              | Invitrogen       | 30-F11       | 12-0451-82 |
| Gr-1                    | FITC            | eBioscience      | RB6-8C5      | 11-5931-85 |
| CD11b                   | PE              | eBioscience      | M1/70        | 12-0112-83 |
| CD3                     | APC-eFluor780   | Invitrogen       | I7A2         | 47-0032-82 |
| B220                    | FITC            | Invitrogen       | RA3-6B2      | 11-0452-82 |
| Ter119                  | APC-eFluor780   | eBioscience      | TER-119      | 47-5921-82 |
| Ter119                  | eFluor 450      | eBioscience      | TER-119      | 48-5921-82 |
| CD45.1                  | PE-Cy7          | eBioscience      | A20          | 25-0453-82 |
| CD45.1                  | PE              | eBioscience      | A20          | 12-0453-83 |
| CD45.2                  | FITC            | eBioscience      | 104          | 11-0454-85 |
| CD45.2                  | APC             | eBioscience      | 104          | 11-0454-82 |
| <b>Other antibodies</b> |                 |                  |              |            |
| Annexin V               | PE              | Becton Dickenson |              | 559763     |
| Ki-67                   | Alexa Fluor 647 | Becton Dickenson | B56          | 551126     |
| streptavidin            | PE              | eBioscience      |              | 12-4317-87 |
| streptavidin            | FITC            | eBioscience      |              | 11-4317-87 |
| streptavidin            | APC             | Invitrogen       |              | 17-4317-82 |
| streptavidin            | Efluro 450      | ebioscience      |              | 48-4317-82 |

### Taqman assays for Q-RT-PCR

| Gene name  | Assay ID      | Company      |
|------------|---------------|--------------|
| RNU44      | 1094          | ThermoFisher |
| snoRNA234  | 1234          | ThermoFisher |
| miR-142-3p | 464           | ThermoFisher |
| miR-142-5p | 2248          | ThermoFisher |
| Cpt1a      | Mm01231183_m1 | ThermoFisher |
| Cpt1b      | Mm00487191_g1 | ThermoFisher |
| Msi2       | Mm01304232_m1 | ThermoFisher |
| $\beta$ 2m | Mm00437762_m1 | ThermoFisher |
| CPT1B      | Hs03046298_s1 | ThermoFisher |

|     |               |              |
|-----|---------------|--------------|
| β2M | Hs00187842_m1 | ThermoFisher |
|-----|---------------|--------------|

### Primer sequences for Q-PCR

| Gene name   | primer | sequence                       |
|-------------|--------|--------------------------------|
| Human NQO-1 | F      | GCCGCAGACCTTGTGATATT           |
|             | R      | TTTCAGAATGGCAGGGACTC           |
| Mouse NQO-1 | F      | TTCTGTGGCTTCCAGGTCTT           |
|             | R      | AGGCTGCTTGGAGCAAATA            |
| Human HO-1  | F      | ATGGCCTCCCTGTACCACATC          |
|             | R      | TGTTGCGCTCAATCTCCTCCT          |
| Mouse HO-1  | F      | CCTTCCCGAACATCGACAGCC          |
|             | R      | GCAGCTCCTCAAACAGCTCAA          |
| Human GAPDH | F      | CCCCTTCATTGACCTCAACTACAT       |
|             | R      | CGCTCCTGGAAGATGGTGA            |
| Mouse GAPDH | F      | GAGCCAAAAGGGTCATCATC           |
|             | R      | TAAGCAGTTGGTGGTGCAGG           |
| Human CPT1B |        | VMPS-1352, RealtimePrimers.com |
| Mouse Cpt1b |        | VHPS-2185, RealtimePrimers.com |

### Primer sequences for CHIP assay

| Gene name   | primer | sequence              |
|-------------|--------|-----------------------|
| Human CPT1B | Pro-F  | CCCCGTGCTGTGTATGTAAC  |
|             | Pro-R  | GTGTGTAAGTCTCGGTTTGG  |
| Human IGS   | Pro-F  | TAAGACCCTGAACCGAAGGA  |
|             | Pro-R  | TCCCCCTTCAAACACAAAC   |
| Mouse Cpt1b | Pro-F  | AACCTTGAGCCCTGGAATTAG |
|             | Pro-R  | ACGTGAGCATGGTTGCAT    |
| Mouse Igs   | Pro-F  | CAGTCCACGCAGTAACTTGT  |
|             | Pro-R  | CTTTCTTGGTGGCTCCAGTC  |

### Antibodies for immunoprecipitation and immunoblotting analyses

| Anti- antibody | manufacturer   | cat      |
|----------------|----------------|----------|
| Nrf2           | Abcam          | ab137550 |
| PARP           | Cell signaling | # 9542   |
| Actin          | Santa Cruz     | sc-47778 |
| Ubiquitin      | Millipore      | 07-375   |
| MFN1           | Cell signaling | # 14739  |

|              |                |            |
|--------------|----------------|------------|
| Tom20        | Santa Cruz     | sc-17764   |
| CPT1A        | Abcam          | ab128568   |
| CPT1B        | Abcam          | ab134988   |
| PKC $\alpha$ | Santa Cruz     | sc-8393    |
| p-NRF2       | Cell Signaling | # 12721    |
| MSI2         | ThermoFisher   | 10770-1-AP |

### Other reagents

| Reagents        | manufacturer | cat                  |
|-----------------|--------------|----------------------|
| NAC             | Selleckchem  | #S5804               |
| SiCPT1A (human) | Horizon      | ID# M-009749-02-0005 |
| SiCPT1B (human) | Horizon      | ID# M-010266-01-0005 |
| siCPT1A (mouse) | Horizon      | ID# E-042456-00-0005 |
| siCPT1B (mouse) | Horizon      | ID# E-043173-00-0005 |
