# Supplementary material for: Acquired miR-142 deficit in leukemic stem cells suffices to drive chronic myeloid leukemia into blast crisis
Source: PubMed Central journal article supplement (PMC10474062; doi:10.1038/s41467-023-41167-z), 2023-09-01
Supplement: 41467_2023_41167_MOESM3_ESM.pdf [file 41467_2023_41167_MOESM3_ESM.pdf]

## Reporting Summary

Nature Portfolio wishes to improve the reproducibility of the work that we publish. This form provides structure for consistency and transparency in reporting. For further information on Nature Portfolio policies, see our [Editorial Policies](#) and the [Editorial Policy Checklist](#).

### Statistics

For all statistical analyses, confirm that the following items are present in the figure legend, table legend, main text, or Methods section.

n/a Confirmed

- The exact sample size ( $n$ ) for each experimental group/condition, given as a discrete number and unit of measurement
- A statement on whether measurements were taken from distinct samples or whether the same sample was measured repeatedly
- The statistical test(s) used AND whether they are one- or two-sided  
*Only common tests should be described solely by name; describe more complex techniques in the Methods section.*
- A description of all covariates tested
- A description of any assumptions or corrections, such as tests of normality and adjustment for multiple comparisons
- A full description of the statistical parameters including central tendency (e.g. means) or other basic estimates (e.g. regression coefficient) AND variation (e.g. standard deviation) or associated estimates of uncertainty (e.g. confidence intervals)
- For null hypothesis testing, the test statistic (e.g.  $F$ ,  $t$ ,  $r$ ) with confidence intervals, effect sizes, degrees of freedom and  $P$  value noted  
*Give  $P$  values as exact values whenever suitable.*
- For Bayesian analysis, information on the choice of priors and Markov chain Monte Carlo settings
- For hierarchical and complex designs, identification of the appropriate level for tests and full reporting of outcomes
- Estimates of effect sizes (e.g. Cohen's  $d$ , Pearson's  $r$ ), indicating how they were calculated

*Our web collection on [statistics for biologists](#) contains articles on many of the points above.*

### Software and code

Policy information about [availability of computer code](#)

Data collection

BD FACSDiva v8 was used to collect flow cytometry data, Zen 2 (blue edition) was used to acquire images.

Data analysis

The data were analyzed by Graphpad Prism v8 (for in vitro and in vivo data), BD FACSDiva v8 and FlowJo v10 (for flow cytometry data), Zen 2 (blue edition) and adobe photoshop 2022 (for microscopy images), Burrows-wheeler Aligner v0.7.17, Picard v2.21.1 and GATK v4.1.7.0 (for DNA-sequencing), Cell Ranger v6.1.2, Seurat v4.1.0 and clusterProfiler v4.2.2 (for single cell RNA-sequencing), and STAR v.2.6.0.a, HTSeqcount v.0.11.1 and "edgeR" (for RNA-sequencing). For untargeted metabolomics dataset, the metabolite classes were mapped to the classical metabolic pathways (i.e., SMPD and KEGG).

For manuscripts utilizing custom algorithms or software that are central to the research but not yet described in published literature, software must be made available to editors and reviewers. We strongly encourage code deposition in a community repository (e.g. GitHub). See the Nature Portfolio [guidelines for submitting code & software](#) for further information.

## Data

Policy information about [availability of data](#)

All manuscripts must include a [data availability statement](#). This statement should provide the following information, where applicable:

- Accession codes, unique identifiers, or web links for publicly available datasets
- A description of any restrictions on data availability
- For clinical datasets or third party data, please ensure that the statement adheres to our [policy](#)

DNA-sequencing data are available at the Sequence Read Archive (SRA; PRJNA895411; <https://www.ncbi.nlm.nih.gov/sra/?term=PRJNA895411>). RNA-sequencing and single cell RNA-sequencing data are available at Gene Expression Omnibus (GEO; RNA-seq: GSE216794 [<https://www.ncbi.nlm.nih.gov/geo/query/acc.cgi?acc=GSE216794>]; scRNA-seq: GSE217076 [<https://www.ncbi.nlm.nih.gov/geo/query/acc.cgi?acc=GSE217076>]) repository of the National Center for Biotechnology Information. Mouse reference genome (mm10) is available at: <https://cf.10xgenomics.com/supp/cell-exp/refdata-gex-mm10-2020-A.tar.gz>. Metabolomic profile are available at the NIH Common Fund's National Metabolomics Data Repository (NMDR) website, the Metabolomics Workbench (<https://www.metabolomicsworkbench.org>, Study ID ST002446, Project DOI: <http://dx.doi.org/10.21228/M8VD8T>).

## Human research participants

Policy information about [studies involving human research participants and Sex and Gender in Research](#).

Reporting on sex and gender

This information has not been collected.

Population characteristics

Human blood or BM donors were between 30-70 years old. CP and BC CML samples were obtained from patients who had not received TKI treatment at the City of Hope National Medical Center (COHNMC). All CML samples used in this study are P210 BCR-ABL positive, as confirmed by FISH analysis and qPCR.

Recruitment

Human blood or BM donors for experiments were anonymous.

Ethics oversight

Sample acquisition was approved by the Institutional Review Board (IRB) at the COHNMC, in accordance with an assurance filed with and approved by the Department of Health and Human Services and met all requirements of the Declaration of Helsinki. Patients with CML were consented on the IRB #18067 protocol.

Note that full information on the approval of the study protocol must also be provided in the manuscript.

## Field-specific reporting

Please select the one below that is the best fit for your research. If you are not sure, read the appropriate sections before making your selection.

Life sciences  Behavioural & social sciences  Ecological, evolutionary & environmental sciences

For a reference copy of the document with all sections, see [nature.com/documents/nr-reporting-summary-flat.pdf](https://www.nature.com/documents/nr-reporting-summary-flat.pdf)

## Life sciences study design

All studies must disclose on these points even when the disclosure is negative.

Sample size

Sample sizes were not based on formal power calculations. It was based on the magnitude, sample availability, consistency of measurable differences between groups. We repeated all of the experiments in the paper using at least 3-4 samples from mouse or human individuals to ensure adequate power. For animal experiments, animal numbers were chosen based on experimental group size, mice availability and variability, treatment frequency and previous experience.

Data exclusions

No animals or samples were excluded from analysis.

Replication

Experiments were replicated multiple times with reproducible results indicated in the figure legends.

Randomization

For all animal experiments, the mice with the same gender and age were divided randomly into experimental groups to reduce variation and enhance power.

Blinding

For some animal studies, the investigators were blinded to the mice allocations while performing the treatment or monitoring the mice for survival, and the investigators learned the genotypes when analyzing the results. For the remaining experiments, the Investigators could not be blinded to sample allocations because they have to allocate these samples first before the treatments.

## Reporting for specific materials, systems and methods

We require information from authors about some types of materials, experimental systems and methods used in many studies. Here, indicate whether each material, system or method listed is relevant to your study. If you are not sure if a list item applies to your research, read the appropriate section before selecting a response.

## Materials & experimental systems

| n/a                                 | Involvement                         | Material                      |
|-------------------------------------|-------------------------------------|-------------------------------|
| <input type="checkbox"/>            | <input checked="" type="checkbox"/> | Antibodies                    |
| <input checked="" type="checkbox"/> | <input type="checkbox"/>            | Eukaryotic cell lines         |
| <input checked="" type="checkbox"/> | <input type="checkbox"/>            | Palaeontology and archaeology |
| <input type="checkbox"/>            | <input checked="" type="checkbox"/> | Animals and other organisms   |
| <input checked="" type="checkbox"/> | <input type="checkbox"/>            | Clinical data                 |
| <input checked="" type="checkbox"/> | <input type="checkbox"/>            | Dual use research of concern  |

## Methods

| n/a                                 | Involvement                         | Method                 |
|-------------------------------------|-------------------------------------|------------------------|
| <input checked="" type="checkbox"/> | <input type="checkbox"/>            | ChIP-seq               |
| <input type="checkbox"/>            | <input checked="" type="checkbox"/> | Flow cytometry         |
| <input checked="" type="checkbox"/> | <input type="checkbox"/>            | MRI-based neuroimaging |

## Antibodies

Antibodies used

Mouse antibodies were used: lineage markers-biotin (Ter-119, CD3, NK1.1, IgM, CD4, CD8a, CD19, Gr-1, CD11b, B220), CD45-PE or FITC or APC-eFlu780, CD45.I-PE-Cy7 or PE, CD45.2-FITC or APC or Pacific blue, Gr-1-FITC, CD11b-PE, CD3-APC-eFlu780, B220-FITC or Pacific blue, Ter119-APC-eFlu780 or eFlu450, Flt3-biotin or PE, IL-7R -biotin or Alexa700 or PE-Cy7, CD117 (c-Kit, clone: ACK2)-APC-eFlu780 or FITC, Sca-1-PE or PE-Cy7, CD34-Alexa647, FeR11/III-PE-Cy7 (all from eBioscience, San Diego, CA), CD150-PerCP-Cy5.5 (Biolegend, San Diego, CA) or PE (eBioscience), and CD48-Pacific blue (Biolegend) or APC (eBioscience). Human antibodies used: anti-CD34-PE-Cy7 or FITC or APC, anti-CD38-PE or APC or APC-eFlu780, anti-CD45-APC or FITC, anti-CD33-PE (all from Becton Dickinson). Other antibodies: anti-streptavidin-PE-Texas Red or APC-eFlu780 or PerCP-Cy5.5, Ki67-APC, Annexin V-PE or APC. Antibodies for immunoprecipitation and immunoblotting: Nrf2 (Abeam, ab137550), PARP (Cell signaling, #9542), Actin (Santa Cruz, sc-47778), Ubiquitin (Millipore, 07-375), MFN1 (Cell signaling, #14739), Tom20 (Santa Cruz, sc-17764), CPT1A and CPT1B (Abeam, ab128568 and ab134988), PKCa (Santa Cruz, sc-8393), p-NRF2 (Cell signaling, #12721), MSI2 (ThermoFisher, 10770-1-AP). Detailed antibody information including manufacturer, cat number and/or clone number were provided in Supplementary Table 6.

Validation

Validation of all primary antibodies for the species and application was performed using variable strategies: cellular distribution, size of bands in western blotting experiments. Antibodies critical for novel conclusions were validated by elimination of signals upon knocking down or inhibiting experiments and/or by functional assays. Validation statements of all antibodies used in this manuscript were noted on the manufacturer's website with relevant citations.

## Animals and other research organisms

Policy information about [studies involving animals](#); [ARRIVE guidelines](#) recommended for reporting animal research, and [Sex and Gender in Research](#)

Laboratory animals

6-12 weeks old wild-type (WT), miR-142 KO, SCLT/TA/BCR-ABL, miR-142 KO SCLT/TA/BCR-ABL (all CD45.2 C57BL/6), CD45.I C57BL/6 (from NCI, as recipient mice), NSG and NSG-SGM3 (both from Jax lab) mice were used.

Wild animals

No wild animals were used in this study.

Reporting on sex

Both male and female mice were used.

Field-collected samples

No field-collected samples were used.

Ethics oversight

Mouse care and experimental procedures were performed in accordance with federal guidelines and protocols and were approved by the Institutional Animal Care and Use Committee at City of Hope (IACUC #15005). All experimental mice are maintained on 12:12-h light:dark cycle, 68-79 F temperature and 30-70% humidity.

Note that full information on the approval of the study protocol must also be provided in the manuscript.

## Flow Cytometry

### Plots

Confirm that:

- The axis labels state the marker and fluorochrome used (e.g. CD4-FITC).
- The axis scales are clearly visible. Include numbers along axes only for bottom left plot of group (a 'group' is an analysis of identical markers).
- All plots are contour plots with outliers or pseudocolor plots.
- A numerical value for number of cells or percentage (with statistics) is provided.

## Methodology

Sample preparation

Human and mouse cells were collected and stained with antibodies for 30 minutes at 4C, as detailed in the methods.

Instrument

BD Fortessa x 20, BD Aria Fusion

Software

BD FACSDiva v8 and FlowJo v10

Cell population abundance

Purity was determined by running a purity check of the sorted populations after the sort was completed.

Gating strategy

All samples were initially gated using forward scatter and side scatter to identify events corresponding to cells, next using forward scatter height vs. area to enrich for single cells, and then alive cells were selected by gating on negative cells for viability dye.

Tick this box to confirm that a figure exemplifying the gating strategy is provided in the Supplementary Information.
