# Supplementary material for: Acquired miR-142 deficit in leukemic stem cells suffices to drive chronic myeloid leukemia into blast crisis
Source: PubMed Central journal article supplement (PMC10474062; doi:10.1038/s41467-023-41167-z), 2023-09-01
Supplement: 41467_2023_41167_MOESM4_ESM.pdf [file 41467_2023_41167_MOESM4_ESM.pdf]

## **Description of Additional Supplementary Files**

### **Supplementary Data 1**

Description: Total compounds and their relative abundances in miR-142<sup>-/-</sup>BCR-ABL vs miR-142<sup>+/+</sup>BCR-ABL Lin-c-Kit<sup>+</sup> cells

### **Supplementary Data 2**

Description: Metabolic changes in Lin-c-Kit<sup>+</sup> cells from miR-142<sup>-/-</sup>BCR-ABL (BC CML) mice compared with Lin-c-Kit<sup>+</sup> cells from miR-142<sup>+/+</sup> BCR-ABL (CP CML) mice
